# Supplementary material for: Differences in the Access to Sterilization between Women Living and Not Living with HIV: Results from the GENIH Study, Brazil
Source: PLoS One. 2016 Nov 3;11(11):e0164887. doi: 10.1371/journal.pone.0164887 (PMC5094764; doi:10.1371/journal.pone.0164887)
Supplement: S1 File — (XLSX) [file pone.0164887.s001.xlsx]

## Sheet: GENIH_conjunto_trabalho_JAN2016
particip	peso	Extrato	UPA	escola_2cat	cor_3cat	laqueadura	N_nativivo	tipo_parto_depHIV	Grupo	tempo_aux	val_laq_cesarea	val_laq_intervalo
7246	1.66145	23	35	2	1	1	3	2	2	42	1	0
11139	2.22086	23	29	1	1	1	2	2	2	25	1	0
1002	3.3	14	1002	1	1	0	2	0	1	45.75	1	2
1003	3.3	14	1003	1	1	0	2	1	1	38	1	2
1006	3.3	14	1006	1	2	0	2	0	1	48.3333	1	2
1008	2.2	3	1008	2	3	0	2	2	1	38.6667	1	2
1009	2.2	3	1009	1	1	0	3	0	1	42.5833	1	2
1012	3.14286	13	1012	1	1	0	2	0	1	43.5833	1	2
1013	3.14286	13	1013	1	1	0	2	0	1	39.5	1	2
1015	3.14286	13	1015	1	1	0	2	0	1	28.3333	1	2
1017	3.14286	13	1017	1	3	0	2	0	1	38.3333	1	2
1018	3.14286	13	1018	1	3	0	2	0	1	46.25	1	2
1020	3.14286	13	1020	2	2	1	3	1	1	29	1	0
1023	3.14286	13	1023	2	3	0	2	1	1	41.4167	1	2
1024	3.14286	13	1024	1	2	0	2	1	1	33.6667	1	2
1025	3.14286	13	1025	1	2	1	3	0	1	36	0	1
1026	3.14286	13	1026	1	1	0	2	1	1	27	1	2
1030	1.57143	7	1030	2	2	0	2	0	1	42	1	2
1031	1.57143	7	1031	2	1	1	2	1	1	20	1	0
1032	1.57143	7	1032	1	2	1	3	1	1	41	1	0
1033	1.57143	7	1033	1	1	1	3	1	1	30	0	1
1034	1.57143	7	1034	2	3	0	2	1	1	34.6667	1	2
1035	1.57143	7	1035	1	1	0	3	2	1	37.0833	1	2
1036	1.57143	7	1036	1	1	0	2	2	1	23.25	1	2
1037	1.57143	7	1037	1	2	0	3	1	1	42.75	1	2
1038	1.57143	7	1038	2	1	0	2	1	1	37.9167	1	2
1039	1.57143	7	1039	1	2	0	2	1	1	42.8333	1	2
1040	1.57143	7	1040	1	1	0	2	2	1	38.3333	1	2
1042	2.34667	16	1042	1	1	0	2	1	1	31.25	1	2
1043	2.34667	16	1043	1	1	0	3	1	1	21.3333	1	2
1044	2.34667	16	1044	2	1	0	2	0	1	36.5	1	2
1046	2.34667	16	1046	2	2	0	3	0	1	45.9167	1	2
1047	2.34667	16	1047	1	1	0	3	0	1	46.8333	1	2
1048	2.34667	16	1048	1	1	0	2	1	1	27.0833	1	2
1050	2.0625	11	1050	1	3	1	3	1	1	36	1	0
1090	2.34667	16	1090	1	1	1	2	2	1	29	0	1
1091	2.34667	16	1091	1	1	1	2	1	1	40	1	0
1093	2.34667	16	1093	1	3	0	3	0	1	44.25	1	2
1094	2.34667	16	1094	2	3	0	2	1	1	37.5	1	2
1095	2.34667	16	1095	1	1	0	3	0	1	36.5	1	2
1096	2.34667	16	1096	2	1	0	2	0	1	47.6667	1	2
1098	2.34667	16	1098	1	3	0	2	0	1	39.5	1	2
1101	1.22222	12	1101	1	3	1	3	1	1	38	1	0
1102	1.22222	12	1102	2	1	0	2	0	1	38.5833	1	2
1103	1.22222	12	1103	1	3	0	3	0	1	38.6667	1	2
1104	1.22222	12	1104	2	3	0	2	2	1	31.1667	1	2
1105	1.22222	12	1105	1	1	0	2	1	1	18.9167	1	2
1106	3.3	14	1106	1	3	0	2	0	1	30.75	1	2
1107	3.3	14	1107	1	1	1	3	1	1	30	1	0
1108	1.83333	15	1108	1	1	1	3	1	1	29	1	0
1125	2.44444	9	1125	2	1	0	2	1	1	32.8333	1	2
1126	2.44444	9	1126	2	1	0	2	0	1	43.9167	1	2
1128	2.44444	9	1128	2	2	0	2	0	1	33.4167	1	2
1129	2.44444	9	1129	1	3	0	2	1	1	26.8333	1	2
1138	2.2	10	1138	1	1	0	3	1	1	44.8333	1	2
2001	3.3	14	2001	2	1	1	3	1	1	31	1	0
2002	3.3	14	2002	1	2	0	2	1	1	24.5	1	2
2003	3.3	14	2003	2	1	0	3	1	1	32.4167	1	2
2010	3.3	14	2010	1	2	1	2	1	1	33	1	0
2021	2.2	3	2021	2	1	0	2	0	1	40.5833	1	2
2022	2.2	3	2022	1	3	1	3	1	1	32	1	0
2023	2.2	3	2023	2	2	0	2	0	1	33.25	1	2
2024	2.2	3	2024	2	3	1	3	1	1	30	1	0
2025	2.2	3	2025	2	1	0	2	0	1	41	1	2
2028	2.2	3	2028	2	3	0	3	2	1	41.5	1	2
2029	2.2	3	2029	1	1	0	2	0	1	36.75	1	2
2033	1.99048	2	2033	2	2	0	2	0	1	39	1	2
2034	1.99048	2	2034	2	3	0	2	2	1	21.8333	1	2
2036	1.99048	2	2036	2	1	0	2	0	1	25.6667	1	2
2038	1.99048	2	2038	2	3	0	2	1	1	28	1	2
2040	1.99048	2	2040	1	3	0	3	1	1	47.5833	1	2
2043	1.99048	2	2043	1	1	0	3	2	1	33.3333	1	2
2044	1.99048	2	2044	1	3	1	2	1	1	24	1	0
2046	1.99048	2	2046	1	2	0	3	1	1	23.1667	1	2
2048	1.99048	2	2048	1	3	1	2	1	1	35	0	1
2049	1.99048	2	2049	2	3	0	2	0	1	35.6667	1	2
2050	1.99048	2	2050	2	1	0	2	0	1	31.6667	1	2
2053	1.99048	2	2053	1	1	0	2	0	1	43.9167	1	2
2054	1.99048	2	2054	2	2	1	3	1	1	22	0	1
2055	1.99048	2	2055	2	1	0	2	0	1	47.6667	1	2
2056	1.99048	2	2056	1	1	0	3	0	1	42.5	1	2
2057	1.99048	2	2057	2	2	0	3	1	1	24.8333	1	2
2058	1.99048	2	2058	2	1	0	2	1	1	31.0833	1	2
2059	2.2	4	2059	2	1	0	2	1	1	37.9167	1	2
2060	2.2	4	2060	1	1	0	2	1	1	41.75	1	2
2062	2.2	4	2062	2	3	0	2	0	1	44.25	1	2
2063	2.2	4	2063	1	3	0	2	0	1	41.1667	1	2
2066	2.2	4	2066	1	3	0	2	1	1	33.5833	1	2
2068	2.2	4	2068	2	3	0	2	1	1	38.25	1	2
2069	2.2	4	2069	2	3	0	3	0	1	46.8333	1	2
2070	2.2	4	2070	1	3	0	2	0	1	30.9167	1	2
2071	2.2	4	2071	1	1	0	2	2	1	41.25	1	2
2072	2.2	4	2072	1	1	0	2	0	1	47.4167	1	2
2081	2.2	4	2081	1	3	0	3	0	1	42.4167	1	2
2082	2.2	4	2082	2	2	0	3	2	1	39.75	1	2
2083	2.2	4	2083	1	1	1	3	2	1	22	0	0
2085	2.2	4	2085	1	3	0	2	0	1	42.6667	1	2
2086	2.2	4	2086	1	3	0	3	1	1	35.75	1	2
2087	2.2	4	2087	2	2	1	3	1	1	28	1	0
2090	2.2	4	2090	2	3	0	2	0	1	47.4167	1	2
2091	2.2	4	2091	2	3	0	2	0	1	38.25	1	2
2092	2.2	4	2092	2	3	0	3	2	1	48.0833	1	2
2100	1.83333	15	2100	1	2	0	2	1	1	22.0833	1	2
2102	1.69231	8	2102	2	2	0	2	0	1	44.3333	1	2
2104	1.69231	8	2104	1	1	0	2	0	1	41.5	1	2
2113	2.44444	9	2113	2	2	1	3	1	1	36	1	0
2119	2.79279	19	5	2	3	0	2	2	2	33.9167	1	2
2121	2.79279	19	5	2	3	0	2	2	2	31.1667	1	2
2122	2.79279	19	5	1	3	0	3	2	2	44.75	1	2
2123	2.79279	19	5	2	1	0	2	1	2	31.5	1	2
2124	2.79279	19	5	2	1	0	2	1	2	32.25	1	2
2125	2.79279	19	5	1	3	1	3	1	2	20	1	0
2126	2.79279	19	5	2	3	0	2	1	2	34.25	1	2
2127	2.79279	19	5	1	1	0	2	2	2	33.25	1	2
2128	2.79279	19	5	2	3	0	2	2	2	49.1667	1	2
2129	2.79279	19	5	1	1	0	2	1	2	38.1667	1	2
2130	2.79279	19	5	2	3	0	2	2	2	22.3333	1	2
2141	2.2	1	2141	2	2	0	3	0	1	29.5	1	2
2142	2.2	1	2142	1	1	0	3	1	1	25.5	1	2
2146	2.2	1	2146	1	1	1	3	1	1	30	1	0
2147	2.2	1	2147	2	3	0	2	1	1	32.5	1	2
2148	1.43313	20	14	1	3	0	3	2	2	45.5	1	2
2149	1.43313	20	14	1	1	0	2	2	2	36.9167	1	2
2150	1.43313	20	14	1	1	0	2	2	2	42	1	2
2151	1.43313	20	14	1	1	0	2	1	2	25.5833	1	2
2152	1.43313	20	14	2	1	0	2	1	2	35	1	2
2153	1.43313	20	14	2	3	0	2	2	2	33.25	1	2
2154	1.43313	20	14	1	3	0	2	1	2	28.5833	1	2
2159	2.2	3	2159	1	1	0	2	1	1	42.75	1	2
2160	2.2	3	2160	2	3	0	2	2	1	37.6667	1	2
2163	2.2	3	2163	2	3	1	3	1	1	30	1	0
2164	2.2	3	2164	2	3	1	3	1	1	37	1	0
2165	2.2	3	2165	2	1	0	2	1	1	44.0833	1	2
2167	2.2	3	2167	2	2	0	2	1	1	37.6667	1	2
2169	2.2	3	2169	1	3	1	2	1	1	26	1	0
2172	2.2	3	2172	2	1	0	2	1	1	30.9167	1	2
2173	2.2	3	2173	2	3	0	2	0	1	23.1667	1	2
2174	2.2	3	2174	1	3	0	2	0	1	35.0833	1	2
2175	2.2	3	2175	1	3	0	2	0	1	46.75	1	2
2176	2.2	3	2176	2	1	0	2	2	1	36	1	2
2177	2.2	3	2177	1	2	0	2	2	1	42.5	1	2
2178	2.2	3	2178	2	1	0	2	0	1	38.4167	1	2
2179	2.2	3	2179	2	1	0	2	0	1	34	1	2
3005	3.3	14	3005	2	1	1	2	1	1	30	1	0
3007	2.2	3	3007	2	3	0	2	0	1	34.0833	1	2
3008	2.2	3	3008	1	1	0	3	1	1	33.4167	1	2
3009	2.2	3	3009	1	3	0	2	0	1	49.75	1	2
3012	2.2	3	3012	2	3	0	2	1	1	32.4167	1	2
3013	2.2	3	3013	2	3	0	2	0	1	35.8333	1	2
3014	3.14286	13	3014	1	1	0	2	0	1	42.8333	1	2
3015	3.14286	13	3015	1	2	1	2	1	1	32	1	0
3016	3.14286	13	3016	1	1	0	2	0	1	38.5	1	2
3017	3.14286	13	3017	2	3	0	2	1	1	45.5833	1	2
3018	3.14286	13	3018	2	1	0	2	2	1	24.5	1	2
3019	3.14286	13	3019	2	2	0	2	0	1	32.75	1	2
3021	1.57143	7	3021	1	2	0	3	2	1	34.75	1	2
3024	1.57143	7	3024	1	2	1	2	2	1	25	0	0
3025	1.57143	7	3025	1	2	0	2	1	1	24.5833	1	2
3026	1.57143	7	3026	1	1	0	2	0	1	32.8333	1	2
3027	1.57143	7	3027	2	3	0	2	1	1	27	1	2
3028	1.57143	7	3028	2	3	0	3	2	1	42.3333	1	2
3029	1.57143	7	3029	2	2	1	3	1	1	33	1	0
3031	1.57143	7	3031	2	2	0	2	1	1	45.6667	1	2
3032	2.2	4	3032	2	3	0	2	1	1	41.75	1	2
3033	2.2	4	3033	2	1	0	2	0	1	41.25	1	2
3034	2.2	4	3034	2	1	0	2	0	1	33.3333	1	2
3039	2.2	4	3039	1	3	0	2	0	1	39.8333	1	2
3040	2.2	4	3040	1	3	0	3	2	1	48.1667	1	2
3044	2.2	4	3044	2	3	0	2	1	1	38.8333	1	2
3046	2.2	4	3046	1	3	1	3	1	1	30	1	0
3047	2.2	4	3047	2	3	0	2	2	1	34.6667	1	2
3050	3.14286	18	3050	1	1	0	2	0	1	31.25	1	2
3051	3.14286	18	3051	2	1	1	2	1	1	28	1	0
3052	3.14286	18	3052	1	3	1	2	1	1	35	1	0
3053	3.14286	18	3053	2	2	1	2	1	1	24	1	0
3055	3.14286	18	3055	2	1	1	3	1	1	29	1	0
3057	3.14286	18	3057	2	3	1	3	1	1	27	1	0
3059	3.14286	18	3059	1	3	0	2	0	1	41.6667	1	2
3060	3.14286	18	3060	1	1	0	2	0	1	38.25	1	2
3061	2.0625	11	3061	1	3	1	3	1	1	35	1	0
3062	2.0625	11	3062	1	3	0	2	0	1	46.6667	1	2
3064	2.0625	11	3064	1	1	0	2	0	1	36.25	1	2
3065	2.0625	11	3065	1	2	0	2	0	1	37.25	1	2
3070	1.83333	15	3070	1	1	0	2	0	1	44.5	1	2
3071	1.83333	15	3071	1	1	0	2	0	1	43.0833	1	2
3072	1.83333	15	3072	2	2	1	2	1	1	#NULL!	#NULL!	#NULL!
3073	1.83333	15	3073	1	1	0	2	1	1	45.6667	#NULL!	#NULL!
3074	1.83333	15	3074	1	1	1	3	0	1	30	0	1
3075	1.83333	15	3075	1	3	1	3	1	1	#NULL!	#NULL!	#NULL!
3076	1.83333	15	3076	1	2	0	2	0	1	31.9167	1	2
3077	1.83333	15	3077	1	3	0	3	0	1	46.4167	1	2
3078	1.83333	15	3078	2	1	0	2	2	1	24.4167	1	2
3079	1.83333	15	3079	2	1	0	2	0	1	42.8333	#NULL!	#NULL!
3094	2.44444	9	3094	1	3	0	2	0	1	25.6667	1	2
3096	2.44444	9	3096	2	2	0	3	1	1	45.0833	1	2
3097	2.44444	9	3097	1	3	0	2	1	1	48.8333	1	2
3098	2.44444	9	3098	1	1	0	3	2	1	21.1667	1	2
3101	2.13912	19	2	2	3	0	3	2	2	46.0833	1	2
3102	2.79279	19	5	1	3	0	2	1	2	27.6667	1	2
3103	2.79279	19	5	2	3	0	3	1	2	33.5833	1	2
3107	2.79279	19	5	2	3	0	2	2	2	48.0833	1	2
3114	3.28099	20	10	1	1	0	2	2	2	41.1667	1	2
3115	1.4053	20	12	1	3	0	3	1	2	#NULL!	1	2
3116	1.4053	20	12	2	2	1	3	2	2	25	0	1
3117	1.4053	20	12	2	1	1	2	1	2	32	1	0
3119	1.4053	20	12	2	2	0	2	2	2	34.5	1	2
4001	3.3	14	4001	2	2	0	2	1	1	31.25	1	2
4003	3.3	14	4003	1	3	0	2	0	1	49.75	1	2
4004	3.3	14	4004	2	1	0	2	0	1	46.3333	1	2
4008	3.3	14	4008	2	3	0	2	1	1	27.4167	1	2
4011	3.3	14	4011	2	2	0	2	0	1	37.5	1	2
4012	3.3	14	4012	2	3	0	2	1	1	29.9167	1	2
4015	2.2	3	4015	2	3	0	2	1	1	32.5	1	2
4016	2.2	3	4016	1	3	0	2	2	1	42.8333	1	2
4018	2.2	3	4018	1	3	0	3	2	1	38.1667	1	2
4020	2.2	3	4020	2	3	0	2	0	1	36.25	1	2
4022	2.2	3	4022	1	3	1	3	1	1	32	1	0
4023	2.2	3	4023	1	3	0	3	1	1	42.5	1	2
4024	2.2	3	4024	2	3	0	2	2	1	45	1	2
4025	2.2	3	4025	2	3	0	2	0	1	37.25	1	2
4028	2.2	3	4028	1	2	1	3	1	1	22	1	0
4029	2.2	3	4029	2	1	0	2	1	1	25.4167	1	2
4030	2.2	3	4030	1	1	1	3	1	1	33	1	0
4031	1.69231	5	4031	1	3	1	3	2	1	33	0	1
4032	1.69231	5	4032	2	3	0	3	0	1	33.0833	1	2
4038	1.69231	5	4038	1	1	0	2	0	1	26.0833	1	2
4039	1.69231	5	4039	1	3	0	2	0	1	29.75	1	2
4041	1.69231	5	4041	2	1	1	2	1	1	23	1	0
4045	1.69231	5	4045	1	3	0	2	0	1	34.5833	1	2
4047	1.69231	5	4047	1	3	0	2	0	1	32.6667	1	2
4050	1.69231	5	4050	2	3	0	2	1	1	32.8333	1	2
4051	1.69231	5	4051	2	3	0	2	1	1	39.5833	1	2
4054	1.69231	5	4054	1	3	0	2	0	1	36.9167	1	2
4056	1.69231	5	4056	1	3	0	3	1	1	38.0833	1	2
4058	1.69231	5	4058	2	3	0	3	0	1	47.5	1	2
4059	2.2	1	4059	1	2	0	2	1	1	45	1	2
4060	2.2	1	4060	1	1	0	2	0	1	30.3333	1	2
4062	2.2	1	4062	2	3	0	2	1	1	24.5833	1	2
4063	2.2	1	4063	2	1	0	2	0	1	30.0833	1	2
4064	2.2	1	4064	1	3	0	3	1	1	43.5	1	2
4065	2.2	1	4065	1	1	0	2	2	1	40.9167	1	2
4067	2.2	1	4067	1	3	0	2	2	1	39.8333	1	2
4068	2.2	1	4068	1	3	1	3	1	1	30	1	0
4070	2.2	1	4070	2	3	0	2	0	1	43.25	1	2
4071	2.2	1	4071	2	1	0	2	0	1	46.1667	1	2
4077	2.2	1	4077	1	3	0	2	2	1	34.3333	1	2
4078	2.2	1	4078	2	1	0	2	0	1	40	1	2
4079	2.2	1	4079	1	1	0	3	1	1	39.1667	1	2
4080	2.2	1	4080	1	3	0	2	0	1	43.5	1	2
4083	2.2	1	4083	1	1	0	3	2	1	31.6667	1	2
4085	2.2	1	4085	1	3	0	2	1	1	25	1	2
4086	2.34667	16	4086	2	3	0	2	0	1	42.5	1	2
4087	2.34667	16	4087	1	1	0	3	1	1	33.1667	1	2
4090	2.34667	16	4090	1	1	0	3	0	1	40.25	1	2
4094	2.34667	16	4094	2	3	0	2	1	1	32.75	1	2
4096	2.34667	16	4096	2	3	0	2	0	1	42.3333	1	2
4097	2.34667	16	4097	1	1	0	3	0	1	42.6667	1	2
4100	2.34667	16	4100	1	1	0	2	0	1	41.4167	1	2
4101	2.34667	16	4101	2	1	0	2	0	1	49.0833	1	2
4102	2.34667	16	4102	1	3	0	2	0	1	24.0833	1	2
4106	2.34667	16	4106	1	3	0	3	0	1	48.25	1	2
4107	2.34667	16	4107	2	3	0	2	1	1	30.9167	1	2
4108	2.34667	16	4108	1	1	0	2	1	1	38.4167	1	2
4110	2.34667	16	4110	1	1	1	3	1	1	35	1	0
4113	2.34667	16	4113	1	3	0	2	1	1	42.3333	1	2
4115	2.2	10	4115	1	1	0	3	2	1	42.5833	1	2
4117	2.2	10	4117	1	3	1	3	2	1	21	0	0
4120	2.2	10	4120	1	3	1	2	0	1	42	0	1
4121	2.2	10	4121	1	3	0	2	0	1	38.0833	1	2
4122	2.2	10	4122	1	1	1	3	1	1	37	1	0
4125	2.2	10	4125	2	1	0	2	0	1	30.6667	1	2
4126	2.2	10	4126	2	1	0	2	1	1	36.5833	1	2
4127	3.48333	6	4127	2	3	0	2	0	1	38.0833	1	2
4128	3.48333	6	4128	1	3	0	3	0	1	49	1	2
4130	3.48333	6	4130	1	1	0	3	2	1	37	1	2
4139	1.64254	19	1	2	3	0	2	2	2	46.5833	1	2
4141	1.64254	19	1	2	1	0	2	1	2	26.75	1	2
4142	1.64254	19	1	1	3	0	2	2	2	37.5833	1	2
4143	1.64254	19	1	2	3	0	2	2	2	19.9167	1	2
4144	1.64254	19	1	1	3	0	3	1	2	47.25	1	2
4145	2.13912	19	2	2	1	0	2	2	2	32.6667	1	2
4147	2.13912	19	2	2	3	0	2	2	2	28.5833	1	2
4148	2.13912	19	2	2	2	0	2	1	2	36.9167	1	2
4149	2.13912	19	2	2	3	0	2	2	2	32.1667	1	2
4150	2.13912	19	2	1	2	1	3	2	2	36	0	1
4152	2.13912	19	2	1	3	0	2	1	2	18.8333	1	2
4153	3.24988	19	3	2	2	0	2	1	2	36.8333	1	2
4154	3.24988	19	3	1	1	1	3	2	2	23	0	1
4161	3.24988	19	3	1	1	1	2	2	2	30	0	1
4162	3.24988	19	3	2	1	0	2	1	2	33.9167	1	2
4163	3.24988	19	3	2	3	0	3	2	2	36.8333	1	2
4176	2.70128	20	6	1	3	0	2	1	2	25.1667	1	2
4177	2.70128	20	6	2	3	0	2	2	2	28.5	1	2
4178	2.70128	20	6	1	3	0	2	2	2	39.9167	1	2
4180	2.70128	20	6	2	1	0	2	1	2	24.4167	1	2
4182	2.70128	20	6	2	3	0	2	1	2	34.5	1	2
4183	2.70128	20	6	1	2	0	2	2	2	34.75	1	2
4184	2.70128	20	6	2	3	1	2	1	2	28	1	0
4186	1.84358	20	8	2	3	0	2	1	2	49.5	1	2
4187	1.84358	20	8	2	3	0	2	2	2	39.6667	1	2
4192	1.84358	20	8	2	1	0	2	1	2	42.6667	1	2
4195	1.84358	20	8	1	3	0	2	1	2	42.8333	1	2
4196	1.84358	20	8	2	1	0	2	2	2	36.8333	1	2
4197	1.84358	20	8	1	1	0	3	2	2	41.1667	1	2
4198	1.84358	20	8	2	3	0	3	2	2	47.6667	1	2
4199	1.84358	20	8	1	1	1	3	2	2	28	0	1
4200	1.84358	20	8	1	3	1	2	2	2	22	0	1
4202	3.28099	20	10	2	3	0	2	2	2	38.0833	1	2
4206	3.28099	20	10	1	3	0	2	2	2	45.1667	1	2
4207	3.28099	20	10	2	1	0	2	2	2	40.25	1	2
4209	3.28099	20	10	1	1	0	2	1	2	47.6667	1	2
4212	3.28099	20	10	2	3	1	2	1	2	24	1	0
4213	3.28099	20	10	1	1	0	2	1	2	43.4167	1	2
4214	3.28099	20	10	2	3	0	2	2	2	32.8333	1	2
4216	3.28099	20	10	2	3	0	2	1	2	28.25	1	2
4217	1.4053	20	12	2	3	1	3	2	2	32	0	1
4218	1.4053	20	12	1	3	0	2	1	2	48.5833	1	2
4219	1.4053	20	12	1	3	0	2	2	2	27.25	1	2
4220	1.4053	20	12	1	1	0	2	1	2	38.25	1	2
4221	1.43313	20	14	2	3	0	2	1	2	36.4167	1	2
4222	1.43313	20	14	1	2	1	3	1	2	31	1	0
4223	1.43313	20	14	2	2	0	2	1	2	26.0833	1	2
4224	1.43313	20	14	2	1	0	2	1	2	30.8333	1	2
4225	1.43313	20	14	1	3	1	3	1	2	28	1	0
4226	1.43313	20	14	2	1	0	2	2	2	27.75	1	2
4227	1.43313	20	14	1	3	0	3	2	2	38.25	1	2
4228	1.43313	20	14	2	1	0	2	2	2	30.3333	1	2
4230	1.43313	20	14	1	3	0	2	1	2	46.0833	1	2
4231	1.43313	20	14	2	3	0	2	1	2	35.75	1	2
4233	1.43313	20	14	2	3	0	2	2	2	46.25	1	2
4234	1.43313	20	14	2	1	0	2	1	2	36.75	1	2
4237	1.49876	21	15	1	3	0	2	2	2	30.4167	1	2
4238	1.49876	21	15	1	1	0	3	1	2	38.0833	1	2
4241	1.49876	21	15	1	3	0	2	1	2	25.25	1	2
4242	1.49876	21	15	2	3	0	2	1	2	31.75	1	2
4245	1.49876	21	15	1	1	0	2	1	2	34.1667	1	2
4246	1.49876	21	15	1	1	0	2	2	2	45.75	1	2
4247	1.49876	21	15	2	1	0	2	1	2	34	1	2
4248	1.49876	21	15	2	3	0	2	1	2	42.6667	1	2
4252	2.02513	21	17	2	3	0	2	2	2	47	1	2
4254	2.02513	21	17	1	1	0	2	2	2	36.5833	1	2
4256	2.02513	21	17	1	1	0	2	1	2	34.5	1	2
4257	2.02513	21	17	2	1	0	2	2	2	26	1	2
4258	2.02513	21	17	1	1	0	2	2	2	28.5	1	2
4259	2.02513	21	17	1	1	0	2	1	2	34.5	1	2
4260	2.02513	21	17	1	1	0	2	2	2	#NULL!	1	2
4261	2.02513	21	17	1	1	0	3	1	2	36.6667	1	2
4262	2.02513	21	17	2	2	1	2	1	2	23	1	0
4263	2.02513	21	17	1	1	0	2	2	2	21.3333	1	2
4265	2.02513	21	17	2	1	0	2	2	2	24.9167	1	2
4266	2.02513	21	17	2	1	0	2	2	2	29.5833	1	2
4273	1.50773	22	20	1	3	0	3	2	2	42.4167	1	2
4274	1.50773	22	20	1	3	0	2	1	2	36.75	1	2
4275	1.49801	22	21	1	3	0	2	2	2	36.4167	1	2
4276	1.49801	22	21	1	1	1	2	2	2	24	0	1
4277	1.49801	22	21	1	3	0	3	1	2	40.0833	1	2
4281	1.49801	22	21	2	3	0	2	1	2	27.6667	1	2
4282	1.49801	22	21	1	1	0	2	1	2	27.25	#NULL!	#NULL!
4283	3.19367	22	23	1	2	0	2	2	2	21.0833	1	2
4284	3.19367	22	23	1	3	1	3	1	2	33	1	0
4285	3.19367	22	23	1	1	0	3	2	2	28.8333	1	2
4286	3.19367	22	23	1	1	0	2	1	2	20.3333	1	2
4288	3.19367	22	23	2	3	0	2	2	2	23.8333	1	2
4289	3.19367	22	23	1	3	0	2	2	2	27.9167	1	2
4292	3.19367	22	23	1	3	0	2	2	2	30.25	1	2
4293	3.19367	22	23	1	3	0	2	1	2	32.4167	1	2
4294	3.19367	22	23	1	1	0	2	2	2	43	1	2
4295	3.19367	22	23	1	1	0	2	2	2	32.4167	1	2
4296	3.19367	22	23	2	3	0	2	2	2	20.5	1	2
4297	3.19367	22	23	2	1	1	3	1	2	32	1	0
4299	1.40379	22	24	1	3	0	2	1	2	37.4167	1	2
4301	1.40379	22	24	2	1	0	2	1	2	26.4167	1	2
4302	1.40379	22	24	1	1	0	2	2	2	23.25	1	2
4303	1.40379	22	24	1	1	0	3	1	2	41.75	1	2
4307	2.36276	22	25	1	1	0	2	2	2	35.9167	1	2
4308	2.36276	22	25	2	1	0	2	2	2	20.75	1	2
4309	2.36276	22	25	2	1	0	2	2	2	39.4167	1	2
4310	2.36276	22	25	1	1	0	2	1	2	37.4167	1	2
4311	2.36276	22	25	2	2	0	2	1	2	36.0833	1	2
4312	2.36276	22	25	1	1	0	2	2	2	33.9167	1	2
4315	2.33628	23	26	2	2	0	2	2	2	35.6667	1	2
4316	2.33628	23	26	1	1	1	3	1	2	22	1	0
4318	2.33628	23	26	2	3	0	2	2	2	40.6667	1	2
4320	2.33628	23	26	2	1	0	2	1	2	28.75	1	2
4321	2.33628	23	26	2	1	0	3	2	2	31.3333	1	2
4322	2.33628	23	26	2	3	1	3	1	2	34	1	0
4323	2.33628	23	26	2	3	0	2	2	2	23.75	1	2
4324	2.33628	23	26	1	3	0	2	2	2	37.25	1	2
4327	2.33628	23	26	2	1	0	3	1	2	39.3333	#NULL!	#NULL!
4328	2.33628	23	26	1	1	0	2	1	2	40.5833	1	2
4329	2.33628	23	26	1	3	0	2	2	2	33.25	1	2
4330	2.33628	23	26	1	3	0	3	2	2	49.25	1	2
4331	1.57314	23	28	1	1	1	3	2	2	33	0	1
4332	1.57314	23	28	2	1	0	2	2	2	24.5833	1	2
4333	1.57314	23	28	1	1	1	2	2	2	26	0	1
4334	1.57314	23	28	1	1	1	2	2	2	38	0	1
4336	1.57314	23	28	2	3	1	2	1	2	19	1	0
4339	1.57314	23	28	2	1	0	2	1	2	40.3333	1	2
4341	1.57314	23	28	1	1	0	2	1	2	43.3333	1	2
4342	1.57314	23	28	1	3	0	2	2	2	39.25	1	2
4355	2.90831	23	32	1	3	0	2	2	2	23.9167	1	2
4357	2.90831	23	32	1	1	1	3	2	2	32	0	1
4358	2.90831	23	32	2	1	0	2	1	2	44.4167	1	2
4359	2.90831	23	32	1	1	0	2	1	2	46.1667	1	2
4362	2.90831	23	32	1	3	1	3	1	2	23	1	0
4363	2.90831	23	32	2	3	0	2	2	2	24.5833	1	2
4364	2.90831	23	32	2	2	0	2	1	2	23.8333	1	2
4366	2.90831	23	32	1	1	1	3	2	2	38	0	1
4368	2.90831	23	32	2	1	0	3	1	2	40	1	2
4370	2.90831	23	32	1	3	0	2	2	2	24.9167	1	2
4376	1.7041	23	34	1	3	0	3	1	2	31.8333	1	2
4377	1.7041	23	34	1	3	0	2	1	2	44	1	2
4380	1.7041	23	34	1	1	1	2	1	2	24	1	0
4381	1.7041	23	34	1	1	1	3	2	2	19	0	1
4385	2.2	4	4385	1	1	0	2	0	1	30.25	1	2
4388	2.2	4	4388	2	3	0	2	2	1	31.3333	1	2
4389	2.2	4	4389	2	3	0	2	1	1	27.0833	1	2
4390	2.2	4	4390	2	3	0	2	1	1	46.4167	1	2
4391	2.2	4	4391	2	2	0	2	0	1	40.6667	1	2
4393	2.2	4	4393	2	1	0	2	0	1	43.1667	1	2
4394	2.2	4	4394	1	3	1	2	1	1	38	1	0
4397	2.2	4	4397	1	3	0	2	0	1	36.75	1	2
4398	2.2	4	4398	2	3	0	2	0	1	48.0833	1	2
4399	2.2	4	4399	2	3	0	2	1	1	30.6667	1	2
4400	2.2	4	4400	1	1	1	2	1	1	35	1	0
5001	3.3	14	5001	1	3	1	3	1	1	36	1	0
5002	3.3	14	5002	1	2	0	2	0	1	30.75	1	2
5003	3.3	14	5003	1	3	0	2	0	1	39.9167	1	2
5006	3.3	14	5006	2	3	1	2	1	1	28	1	0
5007	3.3	14	5007	1	2	0	2	1	1	39.25	1	2
5013	2.2	3	5013	1	2	1	3	1	1	32	1	0
5014	2.2	3	5014	2	1	0	2	1	1	43	1	2
5015	2.2	3	5015	2	3	0	2	0	1	42	1	2
5018	2.2	3	5018	2	1	1	2	1	1	20	1	0
5021	2.2	3	5021	2	3	0	2	0	1	29.0833	1	2
5022	2.2	3	5022	1	1	0	2	0	1	39.8333	1	2
5023	1.69231	5	5023	2	1	0	2	1	1	25.0833	1	2
5025	1.69231	5	5025	2	3	0	2	1	1	31.8333	1	2
5027	1.69231	5	5027	1	#NULL!	0	3	0	1	45.4167	1	2
5028	1.69231	5	5028	1	3	0	2	0	1	39.5833	1	2
5029	1.69231	5	5029	1	3	0	2	0	1	34.1667	1	2
5031	1.69231	5	5031	1	1	0	2	0	1	36.8333	1	2
5036	2.2	1	5036	2	2	0	3	0	1	41.3333	1	2
5039	2.2	1	5039	1	1	0	2	0	1	47.9167	1	2
5040	2.2	1	5040	2	1	0	2	0	1	28	1	2
5041	2.2	1	5041	1	2	0	2	0	1	40.5833	1	2
5042	2.2	1	5042	1	3	0	3	1	1	37.3333	1	2
5043	2.2	1	5043	1	1	1	2	1	1	32	1	0
5044	2.2	1	5044	1	1	0	3	0	1	48.75	1	2
5045	2.34667	16	5045	1	1	0	2	2	1	39.3333	1	2
5046	2.34667	16	5046	2	1	0	2	0	1	36.25	1	2
5047	2.34667	16	5047	2	2	1	3	1	1	25	1	0
5049	2.34667	16	5049	2	1	1	2	1	1	29	0	0
5051	2.34667	16	5051	2	2	1	3	2	1	26	0	1
5053	2.34667	16	5053	1	2	1	3	1	1	32	1	0
5054	2.34667	16	5054	2	3	0	2	0	1	47.3333	1	2
5056	2.34667	16	5056	2	3	1	3	0	1	36	0	1
5057	2.34667	16	5057	1	1	0	3	2	1	34.1667	1	2
5060	2.34667	16	5060	1	1	0	3	0	1	37.1667	1	2
5061	2.34667	16	5061	1	1	0	2	0	1	37.5833	1	2
5065	2.34667	16	5065	2	3	0	2	0	1	47.8333	1	2
5067	2.34667	16	5067	2	1	0	2	0	1	40.1667	1	2
5073	1.64254	19	1	1	3	0	3	2	2	42.75	1	2
5076	1.64254	19	1	1	3	0	2	2	2	25	1	2
5078	1.64254	19	1	1	1	0	3	1	2	28.8333	1	2
5081	1.64254	19	1	1	1	0	3	2	2	27.8333	1	2
5082	1.64254	19	1	1	1	0	2	1	2	48.75	1	2
5083	1.64254	19	1	2	3	0	2	2	2	40.0833	1	2
5085	2.13912	19	2	1	1	0	3	2	2	30	1	2
5086	2.13912	19	2	2	1	0	2	2	2	29	1	2
5091	2.13912	19	2	2	3	0	2	2	2	25.75	1	2
5092	2.13912	19	2	2	3	0	3	2	2	47.9167	1	2
5094	2.13912	19	2	1	1	0	2	1	2	35.1667	1	2
5095	2.13912	19	2	2	3	1	3	1	2	30	0	1
5096	2.13912	19	2	2	1	0	2	2	2	26.8333	1	2
5098	2.13912	19	2	1	3	1	3	2	2	30	0	1
5106	2.79279	19	5	1	2	0	3	2	2	32.5833	1	2
5107	2.79279	19	5	2	1	0	3	2	2	35.0833	1	2
5108	2.79279	19	5	1	2	0	2	1	2	21.8333	1	2
5109	2.32009	20	7	1	3	0	2	1	2	46.0833	1	2
5110	2.32009	20	7	2	2	0	3	2	2	45.0833	1	2
5111	2.32009	20	7	1	3	0	2	1	2	31.5	1	2
5112	2.32009	20	7	1	1	0	2	1	2	27.3333	1	2
5113	2.32009	20	7	2	1	0	2	1	2	22.5833	1	2
5114	2.32009	20	7	1	1	0	2	1	2	49.5833	1	2
5115	2.32009	20	7	1	2	0	3	2	2	32.4167	1	2
5117	2.32009	20	7	1	1	0	2	2	2	46.6667	1	2
5118	2.32009	20	7	1	2	1	2	1	2	25	1	0
5121	1.92418	20	9	1	3	0	3	2	2	48.4167	1	2
5122	1.92418	20	9	2	1	0	2	2	2	44.1667	1	2
5124	1.92418	20	9	1	1	0	2	2	2	33.75	1	2
5126	1.92418	20	9	2	3	0	2	1	2	41.9167	1	2
5127	1.92418	20	9	1	1	0	3	2	2	44.9167	1	2
5129	1.92418	20	9	1	1	1	2	1	2	29	1	0
5131	1.92418	20	9	1	1	0	2	1	2	19.75	1	2
5132	1.92418	20	9	1	3	1	2	1	2	30	0	1
5134	1.92418	20	9	1	3	0	2	1	2	42.5	1	2
5136	1.92418	20	9	2	1	0	3	1	2	30.1667	1	2
5139	1.69408	20	11	1	2	1	3	1	2	25	1	0
5140	1.69408	20	11	1	1	0	2	1	2	21.3333	1	2
5141	1.69408	20	11	2	1	0	2	2	2	23.75	1	2
5142	1.69408	20	11	2	1	0	2	2	2	35	1	2
5143	1.69408	20	11	2	1	0	3	2	2	32.25	1	2
5144	1.69408	20	11	1	2	0	3	2	2	35.8333	1	2
5145	1.69408	20	11	1	1	0	2	2	2	41	1	2
5146	1.69408	20	11	1	3	1	3	1	2	30	1	0
5147	1.69408	20	11	1	1	1	3	1	2	31	1	0
5148	1.69408	20	11	2	3	0	2	1	2	21.3333	1	2
5149	1.69408	20	11	1	1	0	2	2	2	31.25	1	2
5150	1.69408	20	11	2	3	0	2	1	2	20.75	1	2
5151	1.69408	20	11	2	1	0	2	1	2	30.75	1	2
5152	1.69408	20	11	1	1	0	3	2	2	31.75	1	2
5156	1.49876	21	15	1	1	0	2	2	2	33.25	1	2
5158	1.49876	21	15	2	2	0	2	1	2	27.5833	1	2
5161	1.49876	21	15	1	3	0	2	1	2	47.5833	1	2
5162	1.49876	21	15	1	3	1	3	1	2	31	1	0
5164	2.02513	21	17	2	3	0	2	1	2	29.5	1	2
5168	2.02513	21	17	1	3	0	2	1	2	41.3333	1	2
5169	2.02513	21	17	1	3	0	2	2	2	35.75	1	2
5171	2.02513	21	17	2	3	1	3	2	2	24	0	0
5173	2.02513	21	17	2	2	0	2	1	2	43.6667	1	2
5177	2.02513	21	17	1	1	1	2	1	2	23	1	0
5178	2.02513	21	17	1	3	0	2	1	2	21.25	1	2
5179	1.85537	22	18	2	1	0	3	2	2	35.8333	1	2
5180	1.85537	22	18	1	3	0	3	1	2	42	1	2
5181	1.85537	22	18	1	1	0	3	2	2	37.8333	1	2
5183	2.41524	22	19	1	3	0	2	1	2	47.75	1	2
5186	2.41524	22	19	1	3	0	3	2	2	25.5833	1	2
5188	2.41524	22	19	2	3	0	3	2	2	32.9167	1	2
5192	2.41524	22	19	1	1	0	2	2	2	27.25	1	2
5193	2.41524	22	19	2	1	0	2	2	2	19.0833	1	2
5194	2.41524	22	19	1	2	0	2	2	2	21.0833	1	2
5195	2.41524	22	19	2	1	1	2	2	2	21	0	1
5196	1.49801	22	21	2	1	0	2	1	2	41.6667	1	2
5197	1.49801	22	21	1	1	0	2	2	2	25.9167	1	2
5198	1.49801	22	21	1	1	0	2	2	2	37.25	1	2
5199	1.49801	22	21	1	1	0	2	2	2	35.5	1	2
5200	1.49801	22	21	2	1	0	3	2	2	32.8333	1	2
5201	1.49801	22	21	2	3	0	2	2	2	20.6667	1	2
5202	1.03319	22	22	1	1	0	3	2	2	36.4167	1	2
5203	1.03319	22	22	2	3	0	2	2	2	43.25	1	2
5204	1.03319	22	22	1	2	0	2	1	2	45.5833	1	2
5205	1.03319	22	22	1	2	0	2	1	2	41.4167	1	2
5207	1.03319	22	22	1	3	1	3	2	2	29	0	1
5209	1.03319	22	22	1	1	0	2	1	2	#NULL!	1	2
5210	1.03319	22	22	2	1	0	2	2	2	33.75	1	2
5211	1.03319	22	22	2	3	0	3	2	2	29.0833	1	2
5213	1.03319	22	22	1	1	0	2	2	2	40.4167	1	2
5214	1.03319	22	22	2	1	0	2	2	2	40.8333	1	2
5215	1.66145	23	35	2	1	0	3	2	2	31.5833	1	2
5220	1.66145	23	35	2	2	0	2	1	2	37.0833	1	2
5223	1.66145	23	35	1	1	0	3	2	2	41.0833	1	2
5225	1.82612	23	37	1	1	0	3	2	2	25.6667	1	2
5226	1.82612	23	37	1	3	1	3	2	2	26	0	1
5227	1.82612	23	37	1	3	0	2	2	2	25.5833	1	2
5231	2.2	4	5231	2	1	0	2	1	1	37.9167	1	2
5232	2.2	4	5232	2	3	0	3	1	1	42.5	1	2
5233	2.2	4	5233	1	3	0	2	0	1	44.3333	1	2
5234	2.2	4	5234	2	3	0	2	0	1	36.5833	1	2
5235	2.2	4	5235	1	3	0	2	2	1	47	1	2
5236	2.2	4	5236	2	1	0	2	0	1	42.75	1	2
5237	2.2	4	5237	1	3	0	3	1	1	44.4167	1	2
5238	2.2	4	5238	1	1	0	3	0	1	42.6667	1	2
5242	2.2	4	5242	2	3	0	2	1	1	40	1	2
5244	2.2	4	5244	2	3	0	2	0	1	44.75	1	2
5248	2.2	4	5248	2	3	0	2	0	1	45.25	1	2
5250	2.2	4	5250	2	3	0	2	0	1	38.6667	1	2
5251	2.2	4	5251	1	1	0	3	0	1	46.5	1	2
5255	1.87706	23	27	2	1	0	2	2	2	35.8333	1	2
5256	1.87706	23	27	2	1	0	2	1	2	24.6667	1	2
5258	1.87706	23	27	1	3	0	2	2	2	27.0833	1	2
5259	1.87706	23	27	2	1	1	3	2	2	28	0	0
5261	1.87706	23	27	1	3	0	2	2	2	49.75	1	2
6002	3.3	14	6002	2	3	0	2	1	1	36.5	1	2
6003	3.3	14	6003	1	1	0	2	1	1	28.25	1	2
6008	3.3	14	6008	1	3	0	3	2	1	34.3333	1	2
6012	2.2	3	6012	1	2	0	2	0	1	36	1	2
6013	2.2	3	6013	2	1	0	2	0	1	38.75	1	2
6014	2.2	3	6014	1	3	0	2	2	1	45.1667	1	2
6015	2.2	3	6015	1	1	0	2	0	1	44.8333	1	2
6019	1.99048	2	6019	2	3	1	3	1	1	33	1	0
6020	1.99048	2	6020	2	2	0	2	0	1	22.1667	1	2
6021	1.99048	2	6021	2	3	0	2	1	1	42.75	1	2
6023	1.99048	2	6023	2	1	0	2	1	1	26.3333	1	2
6026	1.99048	2	6026	2	3	0	2	1	1	32.4167	1	2
6028	1.99048	2	6028	1	3	0	3	1	1	44.3333	1	2
6029	1.99048	2	6029	1	3	0	2	2	1	24.25	1	2
6033	2.2	4	6033	1	3	0	3	1	1	32.5833	1	2
6034	2.2	4	6034	1	1	1	3	1	1	25	1	0
6036	2.2	4	6036	2	3	0	2	1	1	39.9167	1	2
6037	2.2	4	6037	2	1	0	2	0	1	44.4167	1	2
6038	3.14286	18	6038	2	3	1	3	1	1	26	1	0
6039	3.14286	18	6039	1	2	0	2	1	1	42.5	1	2
6040	3.14286	18	6040	1	2	1	3	1	1	24	1	0
6041	3.14286	18	6041	1	3	1	3	1	1	35	1	0
6042	3.14286	18	6042	1	2	1	2	1	1	32	1	0
6044	3.14286	18	6044	1	1	0	2	0	1	43.75	1	2
6047	2.0625	11	6047	2	1	0	2	1	1	27.4167	1	2
6048	2.0625	11	6048	1	3	1	3	1	1	33	1	0
6050	2.0625	11	6050	2	3	1	3	1	1	26	1	0
6051	2.0625	11	6051	1	2	0	2	2	1	40.25	1	2
6052	2.0625	11	6052	1	1	1	2	1	1	27	1	0
6053	2.0625	11	6053	1	2	0	2	0	1	42.0833	1	2
6054	2.0625	11	6054	2	2	1	3	1	1	27	1	0
6055	2.0625	11	6055	2	3	0	2	0	1	41.3333	1	2
6056	2.0625	11	6056	1	1	0	2	1	1	31.25	1	2
6058	2.0625	11	6058	2	3	0	2	1	1	39.5833	1	2
6060	2.0625	11	6060	2	1	0	3	1	1	38.0833	1	2
6061	2.0625	11	6061	1	2	0	2	0	1	27.0833	1	2
6062	2.0625	11	6062	1	1	1	3	2	1	29	0	0
6063	2.0625	11	6063	1	2	0	2	0	1	48.75	1	2
6064	2.0625	11	6064	1	1	0	2	0	1	39.9167	1	2
6065	2.0625	11	6065	2	2	0	3	1	1	28.25	1	2
6076	1.69231	8	6076	2	1	0	2	1	1	32.25	1	2
6078	2.44444	9	6078	2	3	0	2	1	1	21.6667	1	2
6080	2.13912	19	2	2	1	0	3	1	2	34.25	1	2
6082	2.13912	19	2	1	3	1	2	1	2	26	1	0
6083	2.13912	19	2	2	3	0	2	1	2	42.5833	1	2
6086	2.13912	19	2	2	3	0	2	1	2	48.6667	1	2
6090	3.24988	19	3	2	1	0	2	1	2	31.3333	1	2
6091	3.24988	19	3	1	3	0	3	2	2	49.6667	1	2
6092	3.24988	19	3	1	3	0	3	2	2	45.75	1	2
6094	3.24988	19	3	2	3	0	2	2	2	27.6667	1	2
6095	3.24988	19	3	2	1	1	3	1	2	31	0	0
6096	3.24988	19	3	2	3	0	2	1	2	29.3333	1	2
6100	2.35832	19	4	1	3	0	2	2	2	44.6667	1	2
6101	2.35832	19	4	1	1	1	2	2	2	24	0	1
6104	2.35832	19	4	2	3	0	2	2	2	30.5833	1	2
6107	2.35832	19	4	1	1	1	2	1	2	27	1	0
6108	2.35832	19	4	2	3	0	2	2	2	25.5833	1	2
6111	2.35832	19	4	2	1	0	2	1	2	36.1667	1	2
6114	2.70128	20	6	1	1	1	2	2	2	28	0	1
6118	2.70128	20	6	2	1	0	2	2	2	24.8333	1	2
6123	2.70128	20	6	2	1	0	2	2	2	24.8333	1	2
6126	2.70128	20	6	2	1	0	3	2	2	40.9167	1	2
6127	2.70128	20	6	1	1	0	3	1	2	44.4167	1	2
6129	2.32009	20	7	2	3	0	2	2	2	33.5	1	2
6130	2.32009	20	7	2	1	0	2	1	2	27.8333	1	2
6131	2.32009	20	7	2	1	0	2	2	2	28	1	2
6132	2.32009	20	7	1	3	0	2	2	2	42.3333	1	2
6134	2.32009	20	7	1	1	1	2	1	2	29	1	0
6135	2.32009	20	7	1	1	0	2	1	2	43.9167	1	2
6137	2.32009	20	7	2	2	1	2	1	2	#NULL!	#NULL!	#NULL!
6138	2.32009	20	7	1	2	0	3	2	2	40.5	1	2
6140	1.92418	20	9	2	3	0	2	2	2	32.3333	1	2
6141	1.92418	20	9	2	3	1	3	1	2	25	1	0
6142	1.92418	20	9	1	3	0	2	2	2	21.5833	1	2
6143	1.69408	20	11	2	3	0	2	2	2	49.3333	1	2
6144	1.69408	20	11	1	1	0	2	2	2	20.3333	1	2
6147	1.69408	20	11	1	1	0	2	2	2	20.75	1	2
6148	1.69408	20	11	2	1	0	2	2	2	35.6667	1	2
6149	1.69408	20	11	1	1	0	2	2	2	45.4167	1	2
6150	1.69408	20	11	1	3	0	3	2	2	35	1	2
6151	1.69408	20	11	1	1	0	2	2	2	20.6667	1	2
6152	1.69408	20	11	2	3	0	2	2	2	30.75	1	2
6155	1.69408	20	11	2	1	0	2	2	2	35.8333	1	2
6156	1.69408	20	11	1	1	0	3	2	2	46.5833	1	2
6166	1	20	13	2	1	1	2	1	2	26	1	0
6172	1.48377	21	16	2	1	0	2	2	2	40.0833	1	2
6173	1.48377	21	16	1	3	0	2	2	2	45.5	1	2
6175	1.48377	21	16	1	1	0	2	2	2	22.75	1	2
6177	1.48377	21	16	2	3	0	3	2	2	45.5	1	2
6179	2.41524	22	19	1	3	0	3	2	2	38.9167	1	2
6181	2.41524	22	19	2	2	0	2	2	2	46.3333	1	2
6182	2.41524	22	19	1	1	0	3	2	2	40.25	1	2
6183	2.41524	22	19	2	2	0	2	2	2	42.3333	1	2
6184	2.41524	22	19	2	3	0	2	2	2	48.0833	1	2
6185	1.40379	22	24	2	1	0	2	1	2	27.25	1	2
6186	1.40379	22	24	1	3	0	2	1	2	32.25	1	2
6188	1.40379	22	24	1	1	1	2	2	2	39	0	1
6189	1.40379	22	24	2	2	0	3	2	2	36	1	2
6190	1.40379	22	24	1	1	1	2	1	2	22	1	0
6192	2.33628	23	26	1	1	0	2	2	2	32.1667	1	2
6194	2.33628	23	26	2	1	0	2	2	2	37.4167	1	2
6204	2.22086	23	29	1	2	1	2	2	2	21	0	1
6205	2.22086	23	29	2	1	0	2	2	2	23.6667	1	2
6206	2.22086	23	29	2	3	0	2	2	2	34.4167	1	2
6208	2.22086	23	29	1	1	1	3	2	2	25	0	0
6209	2.22086	23	29	1	1	0	2	2	2	29.8333	1	2
6210	2.22086	23	29	1	1	0	2	2	2	19.9167	1	2
6212	2.22086	23	29	1	2	1	2	2	2	22	0	1
6213	2.22086	23	29	2	3	0	2	1	2	34.3333	1	2
6216	2.22086	23	29	2	3	1	3	2	2	40	0	1
6217	2.22086	23	29	2	1	0	2	2	2	26.6667	1	2
6218	2.22086	23	29	1	3	1	3	1	2	23	1	0
6219	1.31248	23	31	1	1	0	2	2	2	20.3333	1	2
6220	1.31248	23	31	1	3	1	3	1	2	31	1	0
6221	1.31248	23	31	2	1	1	2	1	2	26	1	0
6223	1.31248	23	31	2	3	0	2	1	2	27	1	2
6225	1.31248	23	31	2	1	0	2	1	2	28.0833	1	2
6226	1.31248	23	31	2	1	1	3	2	2	28	0	1
6230	1.31248	23	31	2	3	0	2	1	2	35.5	1	2
6232	1.57818	23	33	2	3	0	2	1	2	28.5	1	2
6233	1.57818	23	33	2	3	0	3	1	2	31.8333	#NULL!	#NULL!
6234	1.57818	23	33	2	3	0	2	1	2	30.0833	1	2
6235	1.57818	23	33	1	3	1	3	1	2	40	1	0
6236	1.57818	23	33	2	3	0	2	1	2	35.3333	1	2
6237	1.57818	23	33	2	3	0	2	2	2	34.9167	1	2
6238	1.57818	23	33	2	1	0	2	2	2	30	1	2
6241	1.57818	23	33	1	1	0	2	1	2	36.9167	1	2
6243	1.82612	23	37	1	1	1	3	2	2	20	0	1
6244	1.82612	23	37	2	3	0	2	2	2	37.3333	1	2
6245	1.82612	23	37	1	1	1	2	1	2	35	1	0
6248	1.82612	23	37	1	1	0	3	2	2	36.0833	1	2
6249	1.82612	23	37	1	3	0	2	1	2	23.9167	1	2
6251	1.45163	23	38	2	3	0	2	1	2	36.6667	1	2
6252	1.45163	23	38	2	2	0	2	2	2	31.6667	1	2
6254	1.45163	23	38	1	3	1	2	1	2	28	1	0
6256	1.45163	23	38	1	3	0	2	1	2	39.25	1	2
6257	1.45163	23	38	1	1	0	2	1	2	37.5	1	2
6258	1.45163	23	38	2	3	0	2	1	2	28.4167	1	2
6260	1.45163	23	38	2	1	0	3	2	2	47	1	2
6263	1.45163	23	38	1	3	0	2	2	2	27.1667	1	2
6264	1.45163	23	38	2	3	0	2	2	2	29.1667	1	2
6265	1.45163	23	38	1	3	0	2	1	2	40	1	2
7005	2.2	3	7005	1	1	1	3	1	1	31	0	0
7006	2.2	3	7006	1	1	1	2	1	1	28	1	0
7007	2.2	3	7007	1	1	0	2	0	1	49.6667	1	2
7008	2.2	3	7008	1	3	1	2	1	1	33	1	0
7012	2.2	3	7012	1	3	0	2	2	1	45	1	2
7013	2.2	3	7013	2	3	0	2	1	1	40.4167	1	2
7018	1.99048	2	7018	1	1	0	2	2	1	18.9167	1	2
7028	2.2	4	7028	2	3	0	2	1	1	35.0833	1	2
7031	2.2	4	7031	1	2	1	3	1	1	29	1	0
7032	2.2	4	7032	1	1	0	2	0	1	38.75	1	2
7033	2.2	4	7033	2	3	0	3	2	1	46.25	1	2
7034	2.2	4	7034	1	1	0	2	0	1	38.1667	1	2
7035	2.2	4	7035	2	3	1	2	1	1	33	1	0
7039	2.2	4	7039	1	3	0	2	0	1	47.1667	1	2
7041	2.2	4	7041	1	3	1	2	1	1	33	1	0
7047	2.2	4	7047	2	1	0	2	1	1	39.5	1	2
7050	2.2	4	7050	2	2	0	2	1	1	42.25	1	2
7051	2.2	4	7051	2	3	0	2	0	1	37.3333	1	2
7052	2.2	4	7052	2	1	0	2	1	1	38.8333	1	2
7053	2.2	4	7053	1	3	0	2	1	1	35.8333	1	2
7054	2.2	4	7054	2	3	1	2	0	1	37	0	1
7055	2.2	4	7055	1	1	0	2	0	1	39.6667	1	2
7057	2.2	4	7057	1	1	0	2	0	1	36.8333	1	2
7058	2.2	4	7058	1	1	0	2	1	1	36.5	1	2
7062	2.34667	16	7062	2	2	0	2	0	1	39.6667	1	2
7065	2.34667	16	7065	2	3	0	2	0	1	48.0833	1	2
7066	2.34667	16	7066	2	3	0	2	0	1	42.6667	1	2
7067	2.34667	16	7067	1	3	1	3	1	1	34	1	0
7069	2.34667	16	7069	2	1	0	2	1	1	35.5833	1	2
7071	2.34667	16	7071	1	3	1	3	1	1	41	1	0
7073	1.22222	12	7073	1	3	0	2	0	1	48.1667	1	2
7074	1.22222	12	7074	1	2	1	3	1	1	22	1	0
7075	1.22222	12	7075	1	3	0	3	0	1	45.9167	1	2
7076	1.22222	12	7076	1	2	0	2	0	1	44.8333	1	2
7083	1.22222	12	7083	1	1	1	3	1	1	26	1	0
7084	1.22222	12	7084	1	1	0	3	2	1	42.25	1	2
7085	1.22222	12	7085	1	3	0	2	1	1	24.6667	1	2
7086	1.22222	12	7086	1	1	0	3	0	1	47.75	1	2
7090	1.22222	12	7090	2	3	0	2	0	1	30.0833	1	2
7091	1.22222	12	7091	1	1	0	2	0	1	36.75	1	2
7093	1.22222	12	7093	2	1	0	3	1	1	39.1667	1	2
7095	1.22222	12	7095	1	3	0	2	2	1	27.1667	1	2
7096	1.22222	12	7096	2	1	0	2	0	1	37.5	1	2
7097	1.22222	12	7097	1	1	0	3	1	1	39.3333	#NULL!	#NULL!
7098	1.22222	12	7098	1	1	1	3	2	1	26	0	0
7099	1.22222	12	7099	1	3	0	3	1	1	26.8333	1	2
7101	1.22222	12	7101	2	2	0	3	0	1	31.4167	1	2
7103	2.75	17	7103	2	3	0	2	0	1	42.4167	1	2
7104	2.75	17	7104	1	3	0	2	0	1	44.1667	1	2
7106	2.75	17	7106	2	3	0	2	2	1	23.75	1	2
7107	2.75	17	7107	2	1	0	2	0	1	26.5	1	2
7108	2.75	17	7108	1	1	1	2	1	1	21	1	0
7112	2.75	17	7112	2	1	0	2	1	1	45.8333	#NULL!	#NULL!
7113	2.75	17	7113	1	1	0	3	2	1	36.9167	1	2
7115	2.75	17	7115	1	2	0	3	2	1	32.8333	1	2
7116	2.75	17	7116	1	1	0	2	0	1	46.25	1	2
7117	2.75	17	7117	2	3	0	3	0	1	43.6667	1	2
7118	2.75	17	7118	2	3	0	2	1	1	39.25	1	2
7119	2.75	17	7119	2	1	0	3	1	1	45	1	2
7120	2.75	17	7120	1	1	0	3	0	1	38.25	1	2
7121	2.75	17	7121	1	1	0	3	0	1	45.1667	1	2
7122	2.75	17	7122	2	1	0	2	#NULL!	1	21.6667	1	2
7124	2.75	17	7124	2	1	0	3	#NULL!	1	33.0833	1	2
7125	2.75	17	7125	1	1	0	2	0	1	36.6667	#NULL!	#NULL!
7126	2.75	17	7126	1	3	1	3	1	1	27	1	0
7134	2.75	17	7134	2	3	0	2	1	1	40.6667	1	2
7135	2.75	17	7135	2	2	0	2	0	1	37.3333	1	2
7136	2.75	17	7136	1	1	0	3	1	1	36.5833	#NULL!	#NULL!
7138	2.75	17	7138	2	3	0	2	0	1	43.8333	1	2
7148	1.64254	19	1	1	1	1	3	1	2	33	1	0
7149	1.64254	19	1	1	3	0	3	2	2	43.25	1	2
7150	1.64254	19	1	1	1	0	2	1	2	27.75	1	2
7152	3.24988	19	3	2	1	0	2	1	2	38.9167	1	2
7153	3.24988	19	3	2	3	0	2	2	2	28.5	1	2
7157	3.24988	19	3	2	1	0	2	1	2	42.4167	1	2
7158	3.24988	19	3	1	1	0	3	1	2	29.8333	1	2
7160	2.35832	19	4	2	3	0	2	1	2	44.3333	1	2
7161	2.35832	19	4	2	1	0	2	2	2	46.8333	1	2
7162	2.35832	19	4	2	1	0	2	2	2	23.3333	1	2
7165	2.35832	19	4	2	1	0	3	2	2	37	1	2
7166	2.35832	19	4	1	1	0	2	2	2	37.9167	1	2
7167	2.35832	19	4	2	2	1	2	2	2	26	0	1
7171	2.70128	20	6	2	1	0	2	2	2	27.0833	1	2
7172	2.70128	20	6	1	1	0	2	2	2	27.3333	1	2
7173	2.70128	20	6	2	1	0	2	2	2	24.75	1	2
7175	2.70128	20	6	2	1	0	2	2	2	26.8333	1	2
7176	1.92418	20	9	2	1	0	2	1	2	48.5833	1	2
7178	1.92418	20	9	1	3	1	3	1	2	33	1	0
7179	1.92418	20	9	2	3	0	2	1	2	22.9167	1	2
7180	1.92418	20	9	1	3	0	3	2	2	36.3333	1	2
7182	1	20	13	2	1	0	2	2	2	30.5	1	2
7183	1	20	13	2	1	0	2	2	2	35.5833	1	2
7184	1	20	13	1	3	0	3	1	2	47.0833	1	2
7185	1	20	13	2	1	0	2	2	2	25.6667	1	2
7186	1	20	13	2	1	0	2	2	2	27.75	1	2
7188	1	20	13	1	3	0	3	2	2	45.75	1	2
7189	1	20	13	2	3	0	2	2	2	28.1667	1	2
7190	1	20	13	2	3	0	2	1	2	36.75	1	2
7192	1	20	13	1	1	0	2	1	2	45.9167	1	2
7193	1	20	13	2	3	0	2	1	2	29	1	2
7195	1	20	13	1	3	0	3	2	2	46.5833	1	2
7197	1.48377	21	16	1	1	0	3	2	2	44	1	2
7198	1.48377	21	16	2	1	0	2	1	2	40.5833	1	2
7199	1.48377	21	16	2	1	0	2	2	2	46.25	1	2
7200	1.48377	21	16	2	3	0	3	2	2	35.6667	1	2
7201	1.48377	21	16	2	1	0	2	1	2	44.25	1	2
7203	1.48377	21	16	2	2	0	2	1	2	46.4167	1	2
7205	1.85537	22	18	1	3	0	3	2	2	40.5833	1	2
7206	1.85537	22	18	1	1	0	3	2	2	25.3333	1	2
7207	1.85537	22	18	1	1	0	2	2	2	29.5833	1	2
7209	1.85537	22	18	2	1	0	2	1	2	34.0833	1	2
7211	1.85537	22	18	1	1	0	2	2	2	20.9167	1	2
7213	1.50773	22	20	2	1	0	2	1	2	27	1	2
7219	3.19367	22	23	1	2	0	3	2	2	32.3333	1	2
7221	3.19367	22	23	1	3	0	2	2	2	27.4167	1	2
7222	3.19367	22	23	1	1	0	2	2	2	33.8333	1	2
7224	2.36276	22	25	2	1	0	2	1	2	18.5833	1	2
7225	2.36276	22	25	1	3	0	2	1	2	45.9167	1	2
7226	2.36276	22	25	1	1	0	2	2	2	20.25	1	2
7228	2.36276	22	25	2	3	0	2	2	2	37.25	1	2
7229	2.36276	22	25	2	2	0	3	1	2	45.75	1	2
7231	2.90831	23	32	1	1	0	2	2	2	29.75	1	2
7232	2.90831	23	32	2	1	0	3	2	2	49.6667	1	2
7234	2.90831	23	32	1	1	0	2	2	2	18.8333	1	2
7235	2.90831	23	32	1	3	1	3	1	2	19	1	0
7238	2.90831	23	32	2	1	0	2	2	2	30.8333	1	2
7240	2.90831	23	32	2	1	0	2	2	2	35.5833	1	2
7241	2.90831	23	32	1	1	0	2	1	2	38.6667	1	2
7242	1.7041	23	34	2	2	0	3	2	2	46.3333	1	2
7243	1.7041	23	34	2	2	0	2	1	2	35.3333	1	2
7244	1.7041	23	34	2	3	0	2	2	2	21	1	2
7249	1.58206	23	36	1	1	0	2	1	2	44.6667	1	2
7250	1.58206	23	36	2	3	0	2	1	2	39.9167	1	2
7251	1.58206	23	36	1	1	0	2	1	2	24.6667	1	2
7252	1.58206	23	36	2	1	0	2	2	2	21.9167	1	2
7253	1.58206	23	36	2	1	0	2	1	2	33.9167	1	2
7254	1.58206	23	36	1	3	0	2	2	2	46.5833	1	2
7256	1.58206	23	36	1	1	0	2	2	2	27.8333	1	2
7260	1.82612	23	37	1	1	0	2	2	2	32.3333	1	2
7261	1.82612	23	37	1	1	0	2	2	2	28.5833	1	2
7263	1.82612	23	37	2	3	0	3	2	2	39.0833	1	2
7264	1.45163	23	38	1	1	0	2	2	2	32.5	1	2
7265	1.45163	23	38	1	1	0	2	1	2	36.75	1	2
7267	1.45163	23	38	1	1	0	2	2	2	21.8333	1	2
7268	1.45163	23	38	1	3	0	3	2	2	30	1	2
8002	2.2	3	8002	2	3	1	2	0	1	39	0	1
8003	2.2	3	8003	1	3	0	3	0	1	32.4167	1	2
8004	2.2	3	8004	2	2	0	2	0	1	46.4167	1	2
8006	2.2	3	8006	2	3	0	2	#NULL!	1	48.6667	1	2
8007	2.2	3	8007	2	2	0	2	0	1	46.1667	1	2
8010	2.2	3	8010	2	3	0	2	0	1	37.5833	1	2
8012	2.2	3	8012	1	1	0	2	1	1	33.25	1	2
8014	1.99048	2	8014	1	2	1	2	2	1	29	0	1
8015	1.99048	2	8015	1	3	0	2	0	1	33.9167	1	2
8016	1.99048	2	8016	1	3	0	2	0	1	35.6667	1	2
8017	1.99048	2	8017	2	1	0	2	0	1	33.3333	1	2
8019	1.99048	2	8019	2	1	0	3	2	1	38.9167	1	2
8020	1.99048	2	8020	1	2	0	2	0	1	44.5833	1	2
8024	1.99048	2	8024	2	3	1	3	2	1	30	0	1
8025	1.99048	2	8025	2	2	1	2	1	1	32	0	1
8027	1.99048	2	8027	1	1	0	2	1	1	41.9167	1	2
8028	1.99048	2	8028	1	1	0	2	0	1	40.8333	1	2
8030	1.99048	2	8030	2	3	0	2	2	1	39.3333	1	2
8031	1.99048	2	8031	1	3	0	2	0	1	43.75	1	2
8034	1.99048	2	8034	1	3	1	2	2	1	23	0	1
8036	1.69231	5	8036	1	3	1	3	1	1	31	1	0
8037	2.2	1	8037	1	3	0	3	2	1	22.5	1	2
8038	2.2	1	8038	2	2	0	2	1	1	29.75	1	2
8039	2.2	1	8039	2	3	0	2	0	1	48.1667	1	2
8041	2.2	1	8041	2	3	0	2	0	1	32.9167	1	2
8042	2.2	1	8042	2	2	0	2	0	1	35.3333	1	2
8046	2.2	1	8046	1	1	0	3	0	1	48.5833	1	2
8047	3.14286	18	8047	1	2	0	2	1	1	27.5	#NULL!	#NULL!
8048	3.14286	18	8048	2	2	1	2	1	1	34	1	0
8049	3.14286	18	8049	1	3	0	2	1	1	26.0833	1	2
8051	3.14286	18	8051	1	1	1	3	1	1	27	1	0
8052	3.14286	18	8052	1	3	1	3	1	1	29	1	0
8054	3.14286	18	8054	2	3	0	2	1	1	46.4167	1	2
8055	3.14286	18	8055	2	1	0	2	0	1	38.4167	1	2
8056	3.14286	18	8056	2	2	0	2	1	1	25.5	1	2
8058	3.14286	18	8058	1	1	1	2	1	1	28	1	0
8059	2.0625	11	8059	1	3	0	3	2	1	43.8333	1	2
8064	2.0625	11	8064	2	3	0	2	0	1	34.6667	1	2
8065	2.0625	11	8065	2	1	0	2	0	1	23.1667	1	2
8066	2.0625	11	8066	2	1	0	2	0	1	31.75	1	2
8067	2.0625	11	8067	1	3	0	2	0	1	38.5	1	2
8069	2.0625	11	8069	2	2	0	2	1	1	36.6667	1	2
8070	2.0625	11	8070	1	1	0	3	0	1	42.3333	1	2
8072	2.0625	11	8072	1	1	0	2	1	1	33.8333	1	2
8074	2.0625	11	8074	1	3	0	2	1	1	46.5833	1	2
8075	2.0625	11	8075	1	1	0	3	2	1	48.5833	1	2
8076	2.0625	11	8076	1	3	0	2	0	1	33.5	1	2
8077	2.0625	11	8077	2	3	0	2	0	1	42.1667	1	2
8078	2.0625	11	8078	1	3	1	3	1	1	37	1	0
8079	2.0625	11	8079	1	2	0	2	0	1	48.9167	1	2
8082	2.0625	11	8082	2	3	0	2	0	1	43.3333	1	2
8083	2.0625	11	8083	2	2	0	2	0	1	30.0833	1	2
8085	2.0625	11	8085	1	2	0	2	0	1	44.25	1	2
8086	2.0625	11	8086	2	1	0	2	1	1	40.6667	1	2
8087	2.0625	11	8087	1	2	0	2	0	1	47.0833	1	2
8090	2.0625	11	8090	1	3	0	2	0	1	34	1	2
8091	2.0625	11	8091	1	2	0	3	2	1	44.8333	1	2
8095	1.69231	8	8095	1	1	0	3	0	1	33.8333	1	2
8098	1.69231	8	8098	2	3	0	2	0	1	41.1667	1	2
8099	1.69231	8	8099	1	1	0	3	0	1	47	1	2
8101	1.69231	8	8101	1	1	1	3	1	1	33	1	0
8108	1.99048	2	8108	1	3	0	2	2	1	27.9167	1	2
8109	1.99048	2	8109	2	1	1	3	1	1	33	1	0
8111	1.99048	2	8111	2	1	0	2	1	1	42.6667	1	2
8114	2.2	10	8114	2	3	0	2	1	1	32.25	1	2
8117	2.2	10	8117	1	3	0	2	0	1	33.9167	1	2
8118	2.2	10	8118	1	1	0	3	1	1	28.5833	1	2
8119	2.2	10	8119	2	1	0	2	1	1	28.4167	1	2
8122	2.2	10	8122	2	3	0	2	2	1	30.0833	1	2
8123	2.2	10	8123	1	1	0	3	0	1	45.0833	1	2
8124	2.2	10	8124	2	1	0	2	1	1	36.5	1	2
8126	2.2	10	8126	2	3	0	2	0	1	34.1667	1	2
8132	1.66145	23	35	2	3	0	2	2	2	38.5	1	2
8133	1.66145	23	35	2	3	0	2	1	2	33.3333	1	2
8135	1.66145	23	35	2	3	1	2	1	2	23	1	0
8136	1.66145	23	35	1	1	0	3	2	2	35.4167	1	2
8137	1.66145	23	35	2	1	0	2	2	2	30.9167	1	2
8138	1.82612	23	37	2	3	0	2	2	2	25.1667	1	2
8140	1.82612	23	37	1	3	0	3	2	2	41.75	1	2
8141	1.82612	23	37	2	1	0	2	2	2	31.5	1	2
8142	1.82612	23	37	1	1	1	3	1	2	30	1	0
8144	1.82612	23	37	1	1	0	2	2	2	25	1	2
8145	1.82612	23	37	2	1	0	2	2	2	33.5833	1	2
8146	1.82612	23	37	1	1	0	2	2	2	42.75	1	2
8147	1.82612	23	37	1	3	0	2	1	2	35.6667	1	2
8148	1.82612	23	37	1	1	1	3	1	2	24	1	0
8151	2.2	4	8151	1	1	0	2	1	1	45.1667	1	2
8152	2.2	4	8152	1	3	0	3	0	1	29.75	1	2
8153	2.2	4	8153	1	3	0	2	0	1	37.6667	1	2
8154	2.2	4	8154	2	1	0	2	0	1	36	1	2
8155	2.2	4	8155	2	2	1	2	1	1	28	1	0
8156	2.2	4	8156	2	1	0	2	0	1	39.6667	1	2
8159	2.2	4	8159	1	3	0	2	0	1	45.9167	1	2
8160	2.2	4	8160	1	1	0	2	0	1	44.6667	1	2
8163	2.2	4	8163	1	3	0	2	2	1	40.8333	1	2
8166	2.2	4	8166	2	3	0	3	2	1	38.8333	1	2
9004	3.3	14	9004	1	3	1	3	1	1	39	1	0
9005	3.3	14	9005	2	3	0	2	0	1	38.4167	1	2
9010	2.2	3	9010	2	1	0	2	1	1	40.6667	1	2
9012	2.2	3	9012	2	1	0	2	0	1	25.1667	1	2
9016	2.2	3	9016	1	1	1	3	1	1	27	1	0
9017	2.2	3	9017	2	1	0	3	0	1	46.5833	1	2
9018	2.2	3	9018	2	3	0	2	0	1	42.5833	1	2
9019	2.2	3	9019	1	#NULL!	0	2	0	1	47.0833	1	2
9020	2.2	3	9020	2	3	0	2	0	1	42.25	1	2
9024	1.57143	7	9024	1	3	0	3	0	1	41.8333	1	2
9025	1.57143	7	9025	1	2	1	2	1	1	29	1	0
9026	1.57143	7	9026	1	1	0	2	0	1	19.25	1	2
9027	1.57143	7	9027	1	3	0	3	0	1	42.8333	1	2
9028	1.57143	7	9028	2	3	0	2	2	1	44.0833	1	2
9029	1.57143	7	9029	1	3	0	3	1	1	45.3333	1	2
9030	1.57143	7	9030	2	2	1	3	2	1	32	0	1
9033	1.57143	7	9033	2	1	0	2	1	1	35.8333	1	2
9034	2.2	4	9034	2	3	0	2	0	1	47.5833	1	2
9035	2.2	4	9035	2	1	1	3	1	1	31	1	0
9038	2.2	4	9038	2	3	0	2	0	1	40.0833	1	2
9040	2.2	4	9040	2	1	0	2	0	1	42.8333	1	2
9041	2.2	4	9041	1	2	0	2	0	1	45.25	1	2
9044	2.2	4	9044	1	1	0	2	0	1	44.8333	1	2
9045	2.2	4	9045	2	1	1	2	1	1	30	1	0
9049	2.2	4	9049	2	1	1	2	1	1	40	1	0
9050	2.2	4	9050	1	1	0	2	0	1	49.6667	1	2
9051	2.2	4	9051	2	1	0	2	0	1	37.5	1	2
9052	2.2	4	9052	2	3	1	2	1	1	38	1	0
9054	2.2	4	9054	1	1	0	2	1	1	45.8333	1	2
9055	2.2	4	9055	1	3	0	2	1	1	44.1667	1	2
9056	2.2	4	9056	1	3	1	3	1	1	32	1	0
9059	2.2	4	9059	1	1	0	2	0	1	43.6667	1	2
9060	2.2	4	9060	2	3	0	2	0	1	47.25	1	2
9062	2.2	4	9062	2	3	0	3	0	1	43.75	1	2
9063	2.2	4	9063	1	1	0	2	2	1	40.75	1	2
9064	2.2	4	9064	2	2	0	2	0	1	38.4167	1	2
9065	2.2	4	9065	2	3	0	2	1	1	34.0833	1	2
9066	2.2	4	9066	2	1	0	2	0	1	42.25	1	2
9069	2.2	4	9069	2	2	0	3	0	1	44.5833	1	2
9070	2.2	4	9070	1	3	0	2	0	1	34.75	1	2
9075	2.2	4	9075	1	3	0	2	1	1	36.6667	1	2
9077	2.2	4	9077	1	1	0	2	0	1	21.25	1	2
9081	2.2	4	9081	2	1	0	2	0	1	41.75	1	2
9082	2.2	4	9082	1	2	0	2	0	1	38.1667	1	2
9083	2.34667	16	9083	1	1	0	2	1	1	20.75	1	2
9084	2.34667	16	9084	2	1	1	3	1	1	28	1	0
9085	2.34667	16	9085	2	2	0	2	0	1	39.0833	1	2
9087	1.22222	12	9087	1	1	0	3	2	1	47.5833	1	2
9088	1.22222	12	9088	1	2	0	2	0	1	45.5833	1	2
9089	1.22222	12	9089	1	3	0	2	1	1	43.25	1	2
9090	1.22222	12	9090	1	3	0	3	1	1	39.5	1	2
9096	1.22222	12	9096	1	1	0	2	1	1	39	1	2
9097	1.22222	12	9097	2	2	0	2	2	1	24.8333	1	2
9098	1.22222	12	9098	1	3	0	2	0	1	35.4167	1	2
9099	1.22222	12	9099	2	3	0	2	1	1	32.9167	1	2
9100	1.22222	12	9100	1	1	0	3	0	1	49.0833	1	2
9101	1.22222	12	9101	1	1	0	2	0	1	31	1	2
9102	1.22222	12	9102	1	1	0	2	0	1	36.0833	1	2
9103	1.22222	12	9103	1	1	0	2	2	1	25.5833	1	2
9107	1.22222	12	9107	2	3	0	2	0	1	37.4167	1	2
9108	1.22222	12	9108	1	2	0	3	2	1	42.1667	1	2
9110	1.22222	12	9110	2	1	0	2	0	1	30.0833	1	2
9112	1.22222	12	9112	1	1	0	3	2	1	37.0833	1	2
9114	1.22222	12	9114	1	1	0	2	1	1	40.0833	1	2
9115	1.22222	12	9115	2	1	0	3	0	1	47.9167	1	2
9116	1.22222	12	9116	1	1	0	2	0	1	46.0833	1	2
9117	1.22222	12	9117	1	1	0	2	0	1	#NULL!	1	2
9118	1.22222	12	9118	1	3	0	2	0	1	49.5	1	2
9120	1.22222	12	9120	1	3	0	3	2	1	34.1667	1	2
9121	1.22222	12	9121	2	3	1	2	1	1	32	0	1
9122	1.22222	12	9122	2	3	0	2	0	1	39.75	1	2
9123	1.22222	12	9123	1	3	0	2	0	1	48.4167	1	2
9124	1.22222	12	9124	2	1	0	3	0	1	44.5	1	2
9125	1.22222	12	9125	1	1	1	3	1	1	32	1	0
9127	1.22222	12	9127	2	3	0	3	0	1	27.3333	1	2
9128	1.22222	12	9128	1	2	0	3	1	1	25.5	1	2
9130	2.75	17	9130	2	2	0	3	0	1	37.4167	1	2
9131	2.75	17	9131	2	1	1	3	1	1	35	1	0
9132	2.75	17	9132	1	1	0	3	2	1	33.1667	1	2
9135	2.75	17	9135	1	2	0	3	0	1	41.4167	1	2
9136	2.75	17	9136	1	3	0	3	2	1	37.25	1	2
9137	2.75	17	9137	2	1	0	2	1	1	43.5	1	2
9139	2.75	17	9139	2	1	0	2	1	1	38.4167	1	2
9140	2.75	17	9140	1	1	0	2	1	1	38	1	2
9141	2.75	17	9141	1	1	0	3	1	1	25.75	1	2
9142	2.75	17	9142	2	1	0	2	0	1	38.9167	1	2
9143	2.75	17	9143	2	2	0	2	0	1	40.4167	1	2
9144	2.75	17	9144	1	1	1	3	1	1	30	0	0
9145	2.75	17	9145	1	1	0	2	0	1	39.75	1	2
9148	2.75	17	9148	1	1	0	2	0	1	42.6667	1	2
9150	2.75	17	9150	2	3	0	2	1	1	36.8333	1	2
9153	2.75	17	9153	1	2	0	3	0	1	49	1	2
9155	2.75	17	9155	1	2	0	2	1	1	39.4167	1	2
9157	2.75	17	9157	2	1	0	2	0	1	31.1667	1	2
9158	2.75	17	9158	1	1	0	3	2	1	36.25	1	2
9159	2.75	17	9159	2	2	0	2	0	1	32.9167	1	2
9160	2.75	17	9160	2	3	0	2	0	1	30.1667	1	2
9180	2.2	10	9180	2	3	0	2	0	1	30.3333	1	2
9181	2.2	10	9181	1	3	0	2	0	1	34.3333	1	2
9182	2.2	10	9182	1	1	0	2	1	1	36.4167	1	2
9184	2.2	10	9184	2	1	0	3	0	1	44.4167	1	2
9185	2.2	10	9185	2	1	0	3	2	1	46	1	2
9186	2.2	10	9186	1	3	0	2	1	1	29.25	1	2
9188	2.2	10	9188	2	3	0	3	2	1	40.75	1	2
9189	2.2	10	9189	2	1	0	3	0	1	38.1667	1	2
9190	2.2	10	9190	1	1	1	3	1	1	39	1	0
9191	2.2	10	9191	1	1	0	2	0	1	27.25	1	2
9192	2.2	10	9192	1	1	0	2	1	1	33.8333	1	2
9193	2.2	10	9193	1	1	0	2	0	1	44.1667	1	2
9194	2.2	10	9194	2	3	0	2	1	1	39.1667	1	2
9196	2.2	10	9196	1	1	0	3	0	1	42	1	2
9199	2.2	10	9199	1	3	0	2	1	1	35.25	1	2
9200	2.2	10	9200	2	2	1	2	0	1	33	0	1
9201	2.2	10	9201	2	2	0	2	0	1	34.5833	1	2
9202	2.2	10	9202	1	1	0	2	0	1	42.5833	1	2
9204	2.2	10	9204	1	2	0	3	0	1	43	1	2
9205	2.2	10	9205	2	2	0	3	0	1	44.1667	1	2
9206	2.2	10	9206	1	1	1	3	1	1	36	1	0
9207	2.2	10	9207	1	1	0	2	1	1	43.6667	1	2
9208	2.2	10	9208	1	3	0	3	2	1	42.3333	1	2
9209	2.2	10	9209	1	2	1	2	2	1	31	0	1
9211	3.48333	6	9211	1	1	0	2	0	1	42.6667	1	2
9212	3.48333	6	9212	2	2	1	3	1	1	25	1	0
9213	3.48333	6	9213	1	2	0	3	0	1	38.1667	1	2
9214	3.48333	6	9214	2	2	0	2	1	1	37.25	1	2
9215	3.48333	6	9215	1	1	1	2	1	1	37	1	0
9216	3.48333	6	9216	1	2	0	3	1	1	40.75	1	2
9217	3.48333	6	9217	2	3	0	2	2	1	37	1	2
9219	3.48333	6	9219	1	1	0	2	0	1	25.1667	1	2
9220	3.48333	6	9220	2	2	0	2	1	1	31.9167	#NULL!	#NULL!
9221	3.48333	6	9221	1	3	0	2	0	1	26.9167	1	2
9222	3.48333	6	9222	1	3	0	3	2	1	47.5833	1	2
9223	3.48333	6	9223	1	1	0	2	2	1	29.8333	1	2
9224	3.48333	6	9224	1	1	0	2	1	1	42.5	1	2
9225	3.48333	6	9225	1	1	0	3	1	1	21.9167	1	2
9226	3.48333	6	9226	1	2	0	2	1	1	23.5833	1	2
9227	3.48333	6	9227	1	2	0	3	0	1	43	1	2
9228	3.48333	6	9228	1	2	0	2	0	1	25.75	1	2
9229	3.48333	6	9229	1	1	0	2	1	1	24.25	1	2
9230	3.48333	6	9230	2	2	0	2	0	1	35.1667	1	2
9231	1.69231	8	9231	1	3	0	2	0	1	31.3333	1	2
9232	1.69231	8	9232	2	3	1	3	1	1	28	1	0
9234	1.69231	8	9234	1	1	0	3	1	1	45.5833	1	2
9235	1.69231	8	9235	2	3	0	2	0	1	34.0833	1	2
9236	1.69231	8	9236	1	1	0	3	1	1	41.5	1	2
9243	1.69231	8	9243	1	1	0	2	2	1	44.6667	1	2
9244	1.69231	8	9244	1	3	0	3	1	1	36.1667	1	2
9262	1.99048	2	9262	1	3	0	2	0	1	44.25	1	2
9264	1.99048	2	9264	1	1	0	3	2	1	33.3333	1	2
9265	1.99048	2	9265	1	1	0	3	1	1	44	1	2
9266	1.99048	2	9266	1	2	0	2	2	1	#NULL!	1	2
9267	1.99048	2	9267	1	1	0	2	0	1	48.1667	1	2
9269	1.99048	2	9269	2	1	0	2	0	1	38.25	1	2
9271	1.99048	2	9271	1	3	0	3	1	1	37.4167	1	2
9272	1.99048	2	9272	1	1	0	3	2	1	40.5	1	2
9273	1.99048	2	9273	1	1	0	2	0	1	40.0833	1	2
9274	2.2	3	9274	2	3	0	2	0	1	30.4167	1	2
9276	2.2	3	9276	2	3	0	2	0	1	49.1667	1	2
9278	2.2	3	9278	1	1	1	3	2	1	33	0	1
9279	2.2	3	9279	1	3	1	3	1	1	30	1	0
9280	2.2	3	9280	2	1	0	3	2	1	45.3333	1	2
10001	2.2	4	10001	2	2	0	3	0	1	40.9167	1	2
10002	2.2	4	10002	2	3	0	2	0	1	35.0833	1	2
10003	2.2	4	10003	1	2	0	3	0	1	42.4167	1	2
10004	2.2	4	10004	2	3	1	3	1	1	35	1	0
10010	2.2	4	10010	2	2	1	2	1	1	29	1	0
10013	2.2	4	10013	1	1	1	2	0	1	46	0	1
10014	2.2	4	10014	1	1	0	2	0	1	40.9167	1	2
10019	2.2	4	10019	1	2	0	3	0	1	40.75	1	2
10024	2.2	4	10024	1	1	0	3	0	1	33.5	1	2
10025	2.2	4	10025	1	3	1	3	2	1	44	0	1
10026	2.34667	16	10026	1	3	0	2	0	1	43.4167	1	2
10027	2.34667	16	10027	1	2	0	2	0	1	26.5	#NULL!	#NULL!
10028	2.34667	16	10028	2	2	0	2	1	1	42.25	#NULL!	#NULL!
10030	1.22222	12	10030	2	3	0	2	0	1	24.0833	1	2
10032	1.22222	12	10032	1	2	0	3	2	1	47.5833	1	2
10033	1.22222	12	10033	1	1	0	2	2	1	32	1	2
10034	1.22222	12	10034	1	1	0	3	2	1	40.75	1	2
10035	1.22222	12	10035	2	3	0	2	0	1	44.25	1	2
10036	2.75	17	10036	1	1	0	3	2	1	39.1667	1	2
10037	2.75	17	10037	2	3	0	2	1	1	31.8333	1	2
10038	2.75	17	10038	1	3	1	2	1	1	34	1	0
10053	2.44444	9	10053	1	1	1	3	1	1	29	1	0
10056	3.28099	20	10	2	3	0	2	2	2	23.5	1	2
10057	3.28099	20	10	1	3	0	2	1	2	47.4167	1	2
10058	3.28099	20	10	2	1	0	2	1	2	41.6667	1	2
10059	3.28099	20	10	2	3	0	2	1	2	38.9167	1	2
10060	3.28099	20	10	1	3	0	2	2	2	36.75	1	2
10061	3.28099	20	10	1	1	0	2	2	2	38.8333	1	2
10062	3.28099	20	10	1	3	0	2	2	2	30.5833	1	2
10063	3.28099	20	10	1	1	0	2	1	2	32.1667	1	2
10066	3.28099	20	10	2	1	0	2	1	2	36.6667	1	2
10067	1.4053	20	12	2	1	0	2	2	2	42.8333	1	2
10068	1.4053	20	12	2	1	0	2	2	2	49.75	1	2
10069	1.4053	20	12	1	1	0	2	1	2	27.8333	1	2
10070	1.4053	20	12	1	3	1	3	1	2	29	1	0
10073	1.4053	20	12	2	1	0	2	1	2	36.25	1	2
10075	1.4053	20	12	2	1	0	3	2	2	35.1667	1	2
10077	1	20	13	2	2	0	2	1	2	36.4167	1	2
10078	1	20	13	1	1	0	3	2	2	40	1	2
10079	1	20	13	1	1	0	2	2	2	24.6667	1	2
10080	1	20	13	2	3	0	2	1	2	37.25	1	2
10082	1	20	13	2	3	0	2	2	2	30	1	2
10083	1	20	13	2	1	1	2	1	2	26	1	0
10084	1.43313	20	14	2	1	0	2	1	2	40	1	2
10085	1.43313	20	14	2	3	0	2	1	2	33.75	1	2
10086	1.43313	20	14	2	1	0	2	1	2	24.8333	1	2
10095	1.83282	23	30	1	3	0	2	1	2	23.5833	1	2
10096	1.83282	23	30	2	2	0	3	2	2	30.6667	1	2
10098	1.83282	23	30	2	1	0	3	1	2	29	1	2
10099	1.83282	23	30	2	1	0	2	1	2	36.5833	1	2
10100	1.83282	23	30	1	1	0	2	2	2	35.3333	1	2
10101	1.83282	23	30	1	3	0	2	2	2	39.4167	1	2
10102	1.83282	23	30	2	3	0	2	2	2	36	1	2
10103	1.83282	23	30	2	1	0	2	2	2	42.9167	1	2
10104	1.83282	23	30	2	1	0	2	1	2	29.0833	1	2
10106	1.83282	23	30	1	3	0	2	1	2	43.0833	1	2
10109	1.83282	23	30	1	2	0	3	2	2	37	1	2
10110	1.83282	23	30	2	3	0	2	1	2	41.6667	1	2
10111	1.83282	23	30	2	3	0	2	2	2	30.75	1	2
10112	1.83282	23	30	1	1	1	3	1	2	30	1	0
10114	1.87706	23	27	2	1	1	3	1	2	24	1	0
10115	1.87706	23	27	1	1	1	3	1	2	20	0	1
11003	1.84358	20	8	1	1	0	2	2	2	30.6667	1	2
11004	1.84358	20	8	1	1	1	3	2	2	36	0	1
11008	1.84358	20	8	2	1	0	2	2	2	23.9167	1	2
11009	1.84358	20	8	2	1	0	3	2	2	38.6667	1	2
11010	1.84358	20	8	1	1	0	2	1	2	44.5833	1	2
11012	1.84358	20	8	2	1	0	2	1	2	46.75	1	2
11013	1.84358	20	8	2	1	0	2	2	2	34.8333	1	2
11014	1.84358	20	8	1	3	0	2	2	2	36.9167	1	2
11017	1.84358	20	8	2	2	0	2	2	2	31	1	2
11018	1.84358	20	8	2	1	0	2	2	2	24.5	1	2
11020	3.28099	20	10	1	3	0	2	1	2	42.25	1	2
11022	3.28099	20	10	1	1	0	2	2	2	43	1	2
11027	1.85537	22	18	1	3	0	3	2	2	39.1667	1	2
11028	1.85537	22	18	2	3	0	2	2	2	23	1	2
11030	1.85537	22	18	2	3	0	2	1	2	27	1	2
11031	2.41524	22	19	2	3	0	2	1	2	44.0833	1	2
11033	2.41524	22	19	1	1	0	2	1	2	21.75	1	2
11035	2.41524	22	19	2	1	0	2	2	2	29.4167	1	2
11036	1.85537	22	18	1	2	1	3	1	2	32	1	0
11037	1.85537	22	18	1	3	0	3	2	2	44	1	2
11041	1.85537	22	18	2	2	0	3	2	2	47.75	1	2
11042	2.41524	22	19	2	3	0	2	2	2	27.8333	1	2
11043	2.41524	22	19	2	3	0	2	1	2	37.6667	1	2
11045	2.41524	22	19	2	1	0	3	2	2	42.8333	1	2
11047	2.41524	22	19	2	1	0	2	2	2	25.9167	1	2
11048	1.49801	22	21	1	1	0	2	1	2	20.25	1	2
11049	1.49801	22	21	1	3	0	3	1	2	20.5	1	2
11052	1.49801	22	21	1	3	1	2	1	2	33	1	0
11053	1.49801	22	21	2	2	1	2	1	2	33	1	0
11055	1.49801	22	21	1	1	0	2	2	2	21.9167	1	2
11056	1.49801	22	21	1	1	0	2	1	2	26	1	2
11057	1.49801	22	21	1	1	0	2	2	2	25.9167	1	2
11059	1.03319	22	22	1	1	0	3	2	2	35.1667	1	2
11060	1.03319	22	22	1	3	0	2	2	2	37.4167	1	2
11061	1.03319	22	22	1	2	0	3	2	2	30.4167	1	2
11062	1.03319	22	22	1	3	1	3	2	2	40	0	1
11063	1.03319	22	22	1	1	1	3	2	2	39	0	0
11064	1.03319	22	22	2	1	0	2	2	2	31.8333	1	2
11065	1.03319	22	22	2	1	0	2	2	2	32	1	2
11066	1.03319	22	22	1	3	0	3	1	2	42.3333	1	2
11067	1.03319	22	22	1	3	1	3	2	2	29	0	1
11070	1.40379	22	24	2	1	0	2	1	2	33.6667	1	2
11073	1.40379	22	24	1	1	0	2	1	2	48.4167	1	2
11074	1.40379	22	24	1	1	0	3	2	2	26.3333	1	2
11076	1.40379	22	24	1	1	0	2	1	2	29.4167	1	2
11078	1.40379	22	24	1	3	0	2	1	2	48.3333	1	2
11079	1.40379	22	24	1	1	0	2	2	2	36	1	2
11080	1.40379	22	24	1	1	1	3	1	2	26	1	0
11088	1.40379	22	24	1	1	0	2	2	2	25.1667	1	2
11089	1.40379	22	24	1	1	0	3	2	2	35.4167	1	2
11091	1.40379	22	24	2	3	0	2	2	2	23.8333	1	2
11092	1.40379	22	24	2	1	0	2	1	2	32.5833	1	2
11093	2.36276	22	25	2	1	1	2	2	2	36	0	1
11096	2.33628	23	26	2	1	0	2	1	2	32.5	1	2
11097	2.33628	23	26	1	1	0	2	2	2	24.6667	1	2
11098	2.33628	23	26	2	2	1	3	1	2	28	1	0
11128	2.22086	23	29	1	3	1	3	1	2	29	1	0
11129	2.22086	23	29	1	1	1	3	1	2	27	1	0
11130	2.22086	23	29	2	1	0	2	2	2	34.6667	1	2
11131	2.22086	23	29	2	1	0	2	2	2	24.5833	1	2
11134	2.22086	23	29	1	3	0	2	2	2	34	1	2
11135	2.22086	23	29	1	1	0	3	2	2	31.25	1	2
11136	2.22086	23	29	1	1	0	3	2	2	30.9167	1	2
11137	2.22086	23	29	1	2	0	3	2	2	28.6667	1	2
11138	2.22086	23	29	1	1	1	3	1	2	35	1	0
11140	2.22086	23	29	1	1	0	2	2	2	31.5833	1	2
11142	2.22086	23	29	2	1	0	2	1	2	27.6667	1	2
11144	1.31248	23	31	1	1	1	3	1	2	31	1	0
11147	1.31248	23	31	1	3	0	2	2	2	46.8333	1	2
11148	1.31248	23	31	2	1	0	2	1	2	30	1	2
11151	1.31248	23	31	1	1	0	2	1	2	41.4167	1	2
11152	1.31248	23	31	2	1	0	2	2	2	33	1	2
11155	1.31248	23	31	1	3	0	2	2	2	29.1667	1	2
11156	1.31248	23	31	1	1	0	2	1	2	18.25	1	2
11157	1.31248	23	31	1	1	0	3	2	2	20.75	1	2
11158	1.31248	23	31	1	1	1	2	1	2	#NULL!	#NULL!	#NULL!
11160	1.31248	23	31	2	3	0	2	2	2	23.9167	1	2
11163	2.90831	23	32	1	1	0	2	2	2	19.6667	1	2
11164	2.90831	23	32	1	1	0	2	2	2	20.8333	1	2
11165	2.90831	23	32	1	3	0	2	2	2	19.3333	1	2
11166	2.90831	23	32	1	1	0	2	2	2	35	1	2
11167	1.57818	23	33	1	1	0	3	2	2	31.5	1	2
11169	1.57818	23	33	1	1	0	2	2	2	19.0833	1	2
11170	1.57818	23	33	1	1	0	3	2	2	37.9167	1	2
11172	1.57818	23	33	1	1	1	2	1	2	30	1	0
11173	1.57818	23	33	1	3	1	3	1	2	37	1	0
11174	1.57818	23	33	2	2	1	2	1	2	36	0	1
11175	1.57818	23	33	1	1	1	2	1	2	27	0	0
11176	1.57818	23	33	1	1	0	3	1	2	48.5833	1	2
11177	1.57818	23	33	2	3	0	2	1	2	34.5833	1	2
11178	1.57818	23	33	1	1	1	3	2	2	34	0	1
11179	1.57818	23	33	1	1	0	3	1	2	47.6667	1	2
11180	1.57818	23	33	2	1	0	2	1	2	40.6667	1	2
11189	2.2	4	11189	2	1	0	2	1	1	31.5	1	2
11190	2.2	4	11190	1	1	1	3	1	1	34	1	0
11192	2.2	4	11192	1	3	0	2	0	1	40.5833	1	2
11194	2.2	4	11194	1	1	0	2	1	1	28.6667	1	2
11195	2.2	4	11195	1	2	1	2	1	1	#NULL!	#NULL!	#NULL!
13004	1.48377	21	16	2	2	0	2	2	2	49.0833	1	2
13009	1.48377	21	16	2	1	0	3	2	2	31.5	1	2
13010	1.48377	21	16	2	2	0	2	1	2	24.25	1	2
13012	1.48377	21	16	1	1	0	2	2	2	33.8333	1	2
13013	1.48377	21	16	2	1	0	2	2	2	40	1	2
13015	1.48377	21	16	2	1	1	2	1	2	28	1	0
13016	1.48377	21	16	2	3	0	2	2	2	31.9167	1	2
13018	1.48377	21	16	2	1	0	2	2	2	21.75	1	2
13019	1.50773	22	20	1	1	0	2	1	2	29.5833	1	2
13020	1.50773	22	20	2	3	0	3	2	2	36.5833	1	2
13021	1.50773	22	20	2	2	0	2	1	2	28.6667	1	2
13024	1.50773	22	20	1	3	1	3	1	2	24	1	0
13026	1.50773	22	20	2	3	0	3	2	2	43.5833	1	2
13027	1.50773	22	20	2	1	1	2	1	2	34	1	0
13028	1.50773	22	20	2	1	0	2	2	2	24.0833	1	2
13030	3.19367	22	23	1	3	0	2	2	2	34.8333	1	2
13031	3.19367	22	23	2	1	0	2	1	2	25.75	1	2
13032	3.19367	22	23	1	1	0	2	#NULL!	2	19.0833	1	2
13033	3.19367	22	23	1	1	0	2	2	2	20.6667	1	2
13034	3.19367	22	23	1	1	0	3	1	2	31.1667	1	2
13037	3.19367	22	23	1	2	0	3	2	2	41.5	1	2
13039	3.19367	22	23	1	3	0	2	2	2	27.5	1	2
13040	3.19367	22	23	1	1	0	3	2	2	29	1	2
13042	3.19367	22	23	2	1	0	2	1	2	29.3333	1	2
13046	2.36276	22	25	1	1	0	2	2	2	18.0833	1	2
13048	2.36276	22	25	2	1	0	2	2	2	33.5833	1	2
13049	2.36276	22	25	2	1	0	2	1	2	24.4167	1	2
13052	2.36276	22	25	2	3	0	2	1	2	32.5833	1	2
13053	2.36276	22	25	1	3	0	3	2	2	42.8333	1	2
13055	2.36276	22	25	2	1	0	2	2	2	24.4167	1	2
13056	2.36276	22	25	2	3	0	2	1	2	36.25	1	2
13058	2.36276	22	25	2	3	0	2	2	2	23.25	1	2
13062	2.36276	22	25	2	3	0	2	2	2	37.4167	1	2
13063	2.33628	23	26	1	1	0	3	2	2	30.4167	1	2
13064	2.33628	23	26	1	1	1	3	1	2	29	0	1
13065	2.33628	23	26	1	1	0	3	2	2	41.5833	1	2
13066	1.57314	23	28	1	3	0	3	2	2	41.9167	1	2
13067	1.57314	23	28	2	1	0	3	2	2	34.8333	1	2
13068	1.57314	23	28	1	3	1	3	1	2	35	1	0
13069	1.57314	23	28	1	1	0	2	2	2	20.8333	1	2
13073	1.57314	23	28	2	3	0	2	2	2	43.8333	1	2
13088	1.57818	23	33	2	2	0	2	2	2	36.6667	1	2
13089	1.57818	23	33	2	1	1	3	1	2	37	1	0
13090	1.57818	23	33	2	2	0	2	1	2	27.1667	1	2
13091	1.57818	23	33	2	3	0	2	1	2	42.1667	1	2
13093	1.57818	23	33	2	3	0	2	2	2	24.5	1	2
13094	1.7041	23	34	1	1	0	2	2	2	25.5833	1	2
13095	1.7041	23	34	1	1	1	3	1	2	#NULL!	#NULL!	#NULL!
13096	1.7041	23	34	1	1	1	3	1	2	26	1	0
13097	1.7041	23	34	2	1	0	2	1	2	37.1667	1	2
13099	1.7041	23	34	1	1	0	2	2	2	28.5	1	2
13100	1.7041	23	34	1	1	0	3	2	2	32.8333	1	2
13101	1.7041	23	34	2	2	0	2	2	2	37.3333	1	2
13102	1.7041	23	34	1	1	0	3	2	2	40.8333	1	2
13105	1.7041	23	34	2	1	0	3	1	2	35.4167	1	2
13107	1.7041	23	34	2	1	0	2	1	2	32.4167	1	2
13108	1.7041	23	34	2	3	0	2	1	2	37	1	2
13110	1.66145	23	35	1	3	0	2	2	2	42.9167	1	2
13113	1.58206	23	36	2	1	0	2	1	2	31.25	1	2
13114	1.58206	23	36	1	3	0	2	2	2	21.5	1	2
13116	1.58206	23	36	2	3	0	2	1	2	35.3333	#NULL!	#NULL!
13117	1.58206	23	36	1	3	0	3	2	2	22.9167	1	2
13118	1.58206	23	36	2	1	0	2	2	2	41.4167	1	2
13120	1.58206	23	36	1	1	0	3	1	2	39.3333	#NULL!	#NULL!
13121	1.58206	23	36	1	1	0	2	1	2	46.0833	1	2
13126	1.58206	23	36	1	2	0	2	1	2	39.0833	1	2
13127	1.82612	23	37	2	3	0	2	1	2	34	1	2
13128	1.82612	23	37	2	3	0	2	2	2	25.75	1	2
13129	1.82612	23	37	1	3	0	2	2	2	36.5833	1	2
13130	1.82612	23	37	1	3	1	3	1	2	36	1	0
13132	1.45163	23	38	2	3	1	3	2	2	28	0	1
13133	1.45163	23	38	2	1	0	2	2	2	44.3333	1	2
13134	1.45163	23	38	1	2	0	2	1	2	45.6667	1	2
13135	1.45163	23	38	1	3	0	2	2	2	20.75	1	2
13136	1.45163	23	38	1	1	0	2	1	2	29.8333	1	2
13137	1.45163	23	38	2	3	0	2	2	2	35.25	1	2
13138	1.45163	23	38	2	3	0	2	1	2	28.4167	1	2
13139	1.45163	23	38	2	3	0	2	2	2	27.0833	1	2
13140	1.45163	23	38	1	3	0	2	1	2	21.5	1	2
13145	1.45163	23	38	1	1	0	2	2	2	21.5833	1	2
13147	1.45163	23	38	1	3	0	2	2	2	41.75	1	2
13149	1.83282	23	30	2	2	0	2	2	2	34.5833	1	2
13150	1.83282	23	30	1	1	0	2	2	2	22.6667	1	2
13152	1.83282	23	30	2	3	0	2	1	2	39	1	2
13154	1.83282	23	30	1	1	0	2	2	2	24.5833	1	2
13155	1.83282	23	30	1	2	0	3	1	2	35.1667	1	2
13156	1.83282	23	30	1	1	0	2	2	2	26	1	2
13157	1.83282	23	30	2	3	0	2	2	2	31.5	1	2
13159	1.83282	23	30	1	2	1	3	1	2	27	1	0
13165	1.87706	23	27	1	1	1	3	1	2	26	1	0
13166	1.87706	23	27	2	2	0	2	1	2	42.0833	1	2
13167	1.87706	23	27	2	1	0	2	2	2	24	1	2
13168	1.87706	23	27	1	1	0	3	2	2	38.9167	1	2
5080	1.64254	19	1	1	3	0	3	2	2	22.1667	#NULL!	#NULL!
6057	2.0625	11	6057	1	3	0	3	2	1	27.75	#NULL!	#NULL!
6066	2.0625	11	6066	2	1	0	3	2	1	47.75	#NULL!	#NULL!
